# **ΔN-Tp63 mediates Wnt/β-catenin-induced inhibition of differentiation in basal stem cells of mucociliary epithelia**

Maximilian Haas<sup>1,2,3</sup>, José Luis Gómez Vázquez<sup>1,2,#</sup>, Dingyuan Iris Sun<sup>4,+</sup>, Hong Thi Tran<sup>5</sup>, Magdalena Brislinger<sup>1,2,3,6</sup>, Alexia Tasca<sup>1,2</sup>, Orr Shomroni<sup>7</sup>, Kris Vleminckx<sup>5,8</sup>, and Peter Walentek<sup>1,2,3,4,6</sup>

<sup>1</sup> Renal Division, Department of Medicine, University Freiburg Medical Center, Freiburg, Germany

<sup>2</sup> Center for Systems Biological Analysis, Albert Ludwigs University Freiburg, Freiburg, Germany

<sup>3</sup> Spemann Graduate School of Biology and Medicine, Albert Ludwigs University Freiburg, Freiburg, Germany

<sup>4</sup> Genetics, Genomics and Development Division, Molecular and Cell Biology Department, University of California at Berkeley, Berkeley, CA, USA

<sup>5</sup> Department of Biomedical Molecular Biology, Ghent University, Ghent, Belgium

<sup>6</sup> CIBSS - Centre for Integrative Biological Signalling Studies, Albert Ludwigs University Freiburg, Freiburg, Germany

<sup>7</sup> Transcriptome and Genome Core Unit, University Medical Center Göttingen, Göttingen, Germany

<sup>8</sup> Department of Biomolecular Medicine, Ghent University, Ghent, Belgium

**Running title: ΔN-Tp63 and Wnt signaling in mucociliary stem cells**

**Corresponding author & Lead Contact: [peter.walentek@medizin.uni-freiburg.de](mailto:peter.walentek@medizin.uni-freiburg.de)**

**Phone: +49-761-203 97206**

<sup>#</sup> Current address: Universidad Autonoma de Madrid, Madrid, Spain.

<sup>+</sup> Current address: Department of Pathology, University of California San Francisco, San Francisco, CA, USA

37 **Keywords**

38 Wnt/ $\beta$ -catenin signaling, multiciliated cells, Basal cells, mucociliary epithelia, airway  
39 epithelia, *Xenopus*, mouse

40

41

42 **Summary**

43 Mucociliary epithelia provide a first line of defense against pathogens in the airways and  
44 the epidermis of vertebrate larvae. Impaired regeneration and remodeling of mucociliary  
45 epithelia are associated with dysregulated Wnt/ $\beta$ -catenin signaling in chronic airway  
46 diseases, but underlying mechanisms remain elusive and studies of Wnt signaling in  
47 mucociliary cells yield seemingly contradicting results. Employing the *Xenopus*  
48 mucociliary epidermis, the mouse airway, and human airway basal stem cell cultures,  
49 we characterize the evolutionarily conserved roles of Wnt/ $\beta$ -catenin signaling in  
50 mucociliary cells in vertebrates. Wnt signaling is required in multiciliated cells for cilia  
51 formation during differentiation stages, but in Basal cells, Wnt signaling prevents  
52 specification and differentiation of epithelial cell types by activating  $\Delta N$ -TP63  
53 expression. We demonstrate that  $\Delta N$ -TP63 is a master transcription factor in Basal  
54 cells, which is necessary and sufficient to mediate the Wnt-induced inhibition of  
55 differentiation and is required to retain basal stem cells during development. Chronic  
56 stimulation of Wnt signaling leads to mucociliary remodeling and Basal cell hyperplasia,  
57 but this is reversible *in vivo* and *in vitro*, suggesting Wnt inhibition as an option in the  
58 treatment of chronic lung diseases. Our work sheds light into the evolutionarily  
59 conserved regulation of stem cells and differentiation, resolves Wnt functions in  
60 mucociliary epithelia, and provides crucial insights into mucociliary development,  
61 regeneration and disease mechanisms.

62

63

64

## 65 **Introduction**

66 Mucociliary epithelia line the conducting airways of most vertebrates as well as the  
67 epidermis of many vertebrate and invertebrate larvae (Walentek and Quigley, 2017).  
68 They are composed of multiple secretory cell types, including Goblet and outer cells,  
69 which release mucus, along with Ionocytes, Club cells and Small Secretory cells  
70 (SSCs), which release ions and small molecules into the extracellular space; in addition,  
71 multiciliated cells (MCCs) transport fluid along epithelia by coordinated ciliary motion,  
72 and Basal cells (BCs) reside underneath the epithelia and serve as tissue-specific stem  
73 cells (cf. graphical abstract) (Hogan et al., 2014; Rock et al., 2010). Mucociliary epithelia  
74 provide a first line of defense against pathogens by mucociliary clearance, which relies  
75 on the correct numbers and function of MCCs and secretory cells (Mall, 2008).  
76 Aberrations of cell type composition and BC behavior are observed in chronic lung  
77 diseases, e.g. chronic obstructive pulmonary disease (COPD), leading to impaired  
78 clearance and airway infections (Hogan et al., 2014; Tilley et al., 2014). While chronic  
79 lung diseases are among the most common causes of death worldwide, their  
80 pathogenic mechanisms are poorly understood and treatment options are very limited.

81 The plethora of diverse cell signaling functions is contrasted with a small number of  
82 pathways that are employed reiteratively to induce context-dependent responses. This  
83 complicates the interpretation of results from experimental manipulations of cell  
84 signaling in any given process or tissue. Wnt/ $\beta$ -catenin signaling regulates gene  
85 expression and plays a role in virtually all cells and tissues (Clevers, 2006). The  
86 pathway is activated by extracellular binding of Wnt ligands to Frizzled receptors and  
87 LRP5/6 co-receptors, which then recruit components of the  $\beta$ -catenin destruction  
88 complex including the kinase GSK3 $\beta$  to the membrane, where they are inhibited  
89 (Niehrs, 2012).  $\beta$ -catenin is then stabilized and enters the nucleus where it acts as  
90 transcriptional co-regulator through binding to TCF/LEF transcription factors.

91 Wnt/ $\beta$ -catenin signaling functions in mucociliary epithelia, but results from manipulations  
92 often appear contradictory as to the exact roles Wnt signaling plays in different cell  
93 types and processes. Wnt/ $\beta$ -catenin was suggested to promote MCC specification and  
94 expression of *FOXJ1*, a key transcription factor in motile cilia formation (Hou et al.,

95 2019; Huang and Niehrs, 2014; Malleske et al., 2018; Stubbs et al., 2008; Walentek et  
96 al., 2012, 2015). In contrast, Wnt/ $\beta$ -catenin activation can also lead to loss of MCCs or  
97 Goblet secretory cell hyperplasia (Hashimoto et al., 2012; Mucenski et al., 2005;  
98 Reynolds et al., 2008; Schmid et al., 2017). Complicating matters further, additional  
99 effects for Wnt were proposed in submucosal glands, during regeneration and in  
100 regulating proliferation (Driskell, 2004; Hogan et al., 2014; Pongracz and Stockley,  
101 2006). Dysregulation of Wnt signaling is commonly observed in chronic lung diseases  
102 such as COPD (Baarsma and Königshoff, 2017; Pongracz and Stockley, 2006). Thus,  
103 fundamental knowledge on the precise roles of Wnt/ $\beta$ -catenin in mucociliary cells is  
104 crucial to understand disease mechanisms and can provide entry points to develop  
105 treatments for patients.

106 We investigated the roles of Wnt/ $\beta$ -catenin in vertebrate mucociliary epithelia using the  
107 embryonic *Xenopus* epidermis, the mouse airway and human airway basal cell culture  
108 as models. Employing a combination of signaling reporter studies with single cell  
109 resolution, manipulations of the Wnt pathway during various phases of development  
110 and regeneration, and in epistasis experiments with downstream factors, we  
111 characterize the roles and effects of signaling on mucociliary cell types. Our data  
112 confirm a role of Wnt/ $\beta$ -catenin signaling in MCC differentiation, but also show its  
113 importance in the regulation of BCs. Collectively, we propose that high levels of Wnt/ $\beta$ -  
114 catenin signaling block differentiation of BCs into epithelial cell types by activating  $\Delta N$ -  
115 *TP63* expression, which is necessary and sufficient to mediate this effect and to retain  
116 stem cells. Importantly, this inhibition of differentiation is reversible *in vivo* and *in vitro*  
117 suggesting local Wnt/ $\beta$ -catenin signaling manipulations to be further explored in the  
118 context of chronic lung diseases associated with airway epithelial remodeling.

119

## 120 **Results**

### 121 *Wnt/ $\beta$ -catenin functions in MCCs and BCs*

122 Wnt/ $\beta$ -catenin signaling was implicated in the specification and differentiation of  
123 secretory cells and MCCs in the mammalian airway as well as the *Xenopus* mucociliary



124 epidermis, which serves as valuable model to investigate the principles of regulation  
125 and function of vertebrate mucociliary epithelia (Huang and Niehrs, 2014; Mucenski et  
126 al., 2005; Walentek et al., 2015). To clarify the roles of Wnt/ $\beta$ -catenin signaling in  
127 mucociliary cell types, we analyzed signaling activity using transgenic reporter lines  
128 expressing GFP upon Wnt/ $\beta$ -catenin activation in *Xenopus* and the mouse (Borday et  
129 al., 2018; Ferrer-Vaquer et al., 2010). Wnt signaling activity was assessed throughout  
130 development of the *Xenopus* epidermis and in the mouse conducting airways until  
131 mucociliary epithelia were fully mature (**Figure 1A,B and Supplemental Figures S1A  
132 and S2A**). While the epidermis and the airways are derived from different germ layers  
133 and formed at different stages relative to organismal development (Walentek and  
134 Quigley, 2017; Warburton et al., 2010), our analysis revealed striking similarities in  
135 Wnt/ $\beta$ -catenin activity in both tissues. Initially, signaling activity was observed in cells  
136 throughout the epithelia, without particular compartmentalization. With progressive  
137 development, Wnt activity was restricted to the sensorial layer of the *Xenopus* epidermis  
138 (**Figure 1A**) and the basal compartment of the pseudostratified airway epithelium  
139 (**Figure 1B**). In both systems, the location of Wnt signaling-positive cells coincided with  
140 the known location of the respective progenitor cell population that gives rise to MCCs  
141 and secretory cells, which then intercalate into the epithelium during differentiation  
142 (Deblandre et al., 1999; Rock et al., 2009; Stubbs et al., 2006). In *Xenopus*, we also  
143 observed GFP-positive cells in the epithelial cell layer during stages of intercalation (st.  
144 25) (**Figure 1A**; arrowheads). En-face imaging in combination with immunostaining for  
145 cell-type markers revealed increased Wnt activity in intercalating MCCs and Ionocytes  
146 at stage 25 (**Supplemental Figure S1B**). In the mature mucociliary epidermis, Wnt  
147 activity was then restricted to MCCs (**Figure 1C**). We also detected elevated Wnt  
148 activity in differentiating MCCs of the mouse airway, although reporter activity was lower  
149 in MCCs as compared to Wnt-positive cells residing at the base of the epithelium  
150 (**Figure 1D and Supplemental Figure S2B**). We generated mouse tracheal epithelial  
151 cell (MTEC) cultures from Wnt-reporter animals and monitored Wnt activity in the air-  
152 liquid interface (ALI) *in vitro* regeneration model at days 1, 4, 7, 14 and 21 (Vladar and  
153 Brody, 2013). Wnt signaling activity was detected throughout all stages of regeneration,

154 with MCCs showing elevated signaling levels as well as reporter-positive cells residing  
155 basally, but no Wnt activity was detected in Club cells (**Supplemental Figure S2C-E**).

156 These data suggested a role for Wnt/ $\beta$ -catenin in basal progenitor cells as well as in  
157 MCCs. To test this, we knocked down  $\beta$ -catenin using morpholino oligonucleotide (MO)  
158 injections targeting the *Xenopus* epidermis, and analyzed epidermal morphology as well  
159 as MCCs (**Figure 1E**). We observed increased numbers of MCCs in  *$\beta$ -catenin*  
160 morphants ( *$\beta$ -catenin* MO), but these MCCs presented reduced numbers of cilia (**Figure**  
161 **1E, Supplemental Figure 1C**). These data resembled experiments using  
162 overexpression of the LRP6-inhibitor *dickkopf 1 (dkk1)* in *Xenopus* (Walentek et al.,  
163 2015). Reduced ciliation rate in  $\beta$ -catenin-deficient MCCs was also compatible with data  
164 demonstrating that  $\beta$ -catenin is a transcriptional co-regulator of *foxj1*, which is required  
165 for motile ciliogenesis in all vertebrate MCCs (Caron et al., 2012; Gomperts, 2004;  
166 Stubbs et al., 2008; Walentek et al., 2012). Nevertheless, the question arose as to why  
167 reduced  $\beta$ -catenin levels increased the overall number of MCCs in the epithelium. As  
168 the basal precursor cell compartment was the site of highest Wnt signaling reporter-  
169 activity in both *Xenopus* and mice, we wondered if loss of  $\beta$ -catenin would affect BCs  
170 and lead to increased MCC specification. We injected  *$\beta$ -catenin* MO targeting  
171 exclusively the right side of embryos, and analyzed marker gene expression for MCCs  
172 and BCs at mid-neurula stages (st. 17), i.e. after cell fate specification. *In situ*  
173 hybridization (ISH) for *foxj1* (MCCs) and  $\Delta N$ -*tp63* (sensorial layer BCs; (Cibois et al.,  
174 2015; Lu et al., 2001)) revealed an increase in *foxj1*-positive cells and reduced  $\Delta N$ -*tp63*  
175 expression on the injected side of the embryos (**Supplemental Figure 1D,E**). This  
176 implicated an increase in MCC specification at the expense of basal progenitors upon  
177 Wnt inhibition. Collectively, our experiments identified MCCs and BCs as sites of  
178 elevated signaling activity during mucociliary development, and a requirement for  
179 controlled Wnt/ $\beta$ -catenin signaling in MCCs and BCs to generate a normal mucociliary  
180 epithelium.

181

182

183 *ΔN-Tp63 is necessary and sufficient to block differentiation in response to Wnt/β-catenin*

184 Airway BCs are tissue-specific stem cells and required for maintenance and  
185 regeneration of all mucociliary cell types (Rock et al., 2010; Zuo et al., 2015). *ΔN-TP63-*  
186 *α* is the dominantly expressed isoform of the transcription factor TP63 in airway BCs  
187 and a commonly used marker for BCs in various epithelia (Arason et al., 2014; Soares  
188 and Zhou, 2018; Warner et al., 2013). Expression of *ΔN-TP63* isoforms is regulated by  
189 an evolutionarily conserved alternative promotor (P2) initiating transcription at  
190 alternative exon 3 (Ruptier et al., 2011). In *Xenopus*, only *ΔN-tp63* isoforms are  
191 expressed during development, and no full-length isoform is annotated in the *X. laevis*  
192 or *X. tropicalis* genomes to date, indicating potential loss of this isoform in the frog.  
193 Nevertheless, in *Xenopus* and in mammals, chromatin immunoprecipitation and DNA-  
194 sequencing (ChIP-seq) has detected multiple TCF/LEF binding sites in P2, suggesting  
195 direct Wnt/β-catenin regulation (Kjolby and Harland, 2017; Ruptier et al., 2011). Since  
196 *ΔN-TP63* is associated with the regulation of differentiation and given our observation  
197 that loss of β-catenin lead to decreased *ΔN-tp63* expression, we tested if *ΔN-tp63* was  
198 Wnt-regulated in the mucociliary epidermis. Ectopic activation of Wnt/β-catenin  
199 signaling was achieved by application of the GSK3β-inhibitor 6-Bromoindirubin-3'-oxime  
200 (BIO) to the medium starting at st. 8 of *Xenopus* development. Efficient activation of the  
201 Wnt pathway in the epidermis was confirmed using the Wnt-reporter line (**Figure 2A**).  
202 First, we analyzed the effects of BIO treatment on epidermal *ΔN-tp63* expression by  
203 ISH. Specimens treated with BIO displayed increased levels of *ΔN-tp63* expression and  
204 a thickening of the sensorial layer (**Figure 2B and Supplemental Figure S3A**). Next,  
205 we treated embryos with BIO from st. 8 until st. 30, when MCCs and Ionocytes have  
206 fully developed, and analyzed cell type composition by immunofluorescent staining  
207 (Walentek, 2018). Treatment with BIO significantly reduced the numbers of all  
208 intercalating cell types in a dose-dependent manner (**Figure 2C and Supplemental**  
209 **Figure S3B,C**). Lack of mature MCCs and Ionocytes could be a result of inhibited cell  
210 fate specification or defective differentiation and intercalation into the epithelium.  
211 Therefore, we also tested the effects of BIO treatment on the expression of early cell  
212 type-markers associated with successful cell fate specification by ISH at st. 17, i.e.

213 before intercalation (Walentek and Quigley, 2017). We observed a loss or strong  
214 reduction in cell type-marker expression for MCCs (*foxj1*), Ionocytes (*foxi1*; (Quigley et  
215 al., 2011)) and SSCs (*foxa1*; (Dubaisi et al., 2014)), indicating a failure in cell fate  
216 specification after BIO application (**Figure 2D and Supplemental Figure S3D,E**).  
217 These data suggested that increased Wnt/ $\beta$ -catenin lead to upregulation of  $\Delta N$ -*tp63* and  
218 expansion of the BC pool, while inhibiting specification of epidermal cell types. To  
219 directly test if  $\Delta N$ -*tp63* was necessary for the block of specification in response to Wnt  
220 overactivation, we injected embryos with a  $\Delta N$ -*tp63* MO at four-cell stage and treated  
221 the morphants either with vehicle or BIO, starting at st. 8. Cell type quantification at st.  
222 30 and ISH marker analysis at st. 17 both showed a partial rescue of cell fate  
223 specification and morphogenesis in  $\Delta N$ -*tp63* MO embryos treated with BIO, and an  
224 increased specification of MCCs and Ionocytes in  $\Delta N$ -*tp63* MO morphants without BIO  
225 application (**Figure 2C,D and Supplemental Figure S3B-E**). Together, these results  
226 indicated that  $\Delta N$ -*tp63* activation was necessary to block differentiation upon BIO  
227 treatment. Next, we wondered if  $\Delta N$ -*tp63* alone was sufficient to inhibit differentiation in  
228 the absence of increased Wnt signaling. Therefore, we generated GFP-tagged and  
229 untagged  $\Delta N$ -*tp63* constructs. Overexpression of *gfp- $\Delta N$ -tp63* in the epidermis and  
230 immunofluorescent staining confirmed successful production of the protein and its  
231 nuclear localization (**Figure 2 E**). Furthermore, injections of *gfp- $\Delta N$ -tp63* or  $\Delta N$ -*tp63*  
232 reduced MCC numbers and expression of early cell type markers for MCCs, Ionocytes  
233 and SSCs (**Figure 2 E,F and Supplemental Figure S4A-C**), thereby providing evidence  
234 for sufficiency. Additionally, we investigated if  $\Delta N$ -*tp63* only inhibits cell fate specification  
235 from BCs or if its activity in cells after specification could inhibit differentiation as well.  
236 For that, we generated a hormone-inducible version of GFP- $\Delta N$ -*tp63* (GFP- $\Delta N$ -*tp63*-  
237 GR; (Kolm and Sive, 1995)), injected embryos at four-cell stage, and added  
238 Dexamethasone (Dex) to the medium at various stages of development. Activation of  
239 the construct and subsequent nuclear localization was confirmed by confocal  
240 microscopy (**Supplemental Figure S4D**). Dex addition at st. 9 suppressed MCC  
241 formation as observed with the non-inducible construct, whereas application of vehicle  
242 at st. 9 or Dex activation after MCC specification at st. 24 did not result in reduced MCC

243 numbers at st. 30 (**Supplemental Figure S4E,F**). High-magnification imaging further  
244 confirmed presence of GFP- $\Delta$ N-tp63-GR in the nuclei of fully differentiated MCCs and  
245 Ionocytes in specimens activated at st. 24 (**Supplementary Figure S4G**). These results  
246 indicated that the inhibitory effect of  $\Delta$ N-tp63 on epithelial cell specification was  
247 restricted to basal progenitors. Finally, we investigated the degree of evolutionary  
248 conservation of the observed effects in human airway basal stem cells. Ectopic  
249 activation of canonical Wnt signaling in ALI cultures derived from immortalized human  
250 airway BCs (BCi-NS1.1 cells, BCIs (Walters et al., 2013)) was induced by application of  
251 human recombinant R-spondin 2 (RSPO2) protein to the medium after initial  
252 epithelialization of cultures was completed at ALI day 7. We then analyzed the effects of  
253 RSPO2 on airway mucociliary regeneration by immunofluorescent staining and  
254 quantitative RT-PCR (qPCR). In BCIs, RSPO2 application inhibited differentiation of  
255 MCCs and Club secretory cells (**Figure 3A,C,D**). At the same time, we observed an  
256 increase in  $\Delta$ N-TP63 expression after RSPO2 treatment as well as elevated levels for  
257 *KRT5* (*Keratin 5*), an additional marker for BCs in airway epithelia (**Figure 3C-E**) (Zuo et  
258 al., 2015). Orthogonal optical sections of confocal images from BCIs stained for  $\Delta$ N-  
259 TP63 or KRT5 further revealed an increase in epithelial thickness and epithelial KRT5-  
260 positive cells after RSPO2 treatment (**Figure 3E,F and Supplemental Figure S5A,B**),  
261 similar to our observations in *Xenopus* and reminiscent of phenotypes in COPD patients  
262 (Rock et al., 2010), potentially indicating early BC hyperplasia. This interpretation of  
263 results was further supported by quantification of Ki67-positive proliferative cells, which  
264 number increased upon RSPO2 treatment, while the total number of epithelial cells  
265 remained low, likely due to inhibited specification and intercalation of MCCs and Club  
266 cells into the epithelium (**Supplemental Figure S5C-E**). To address if Goblet cell  
267 hyperplasia occurred after Wnt/ $\beta$ -catenin gain-of-function in addition to effects on MCC  
268 and Club cell specification, we also analyzed Mucin expression. qPCR on BCIs treated  
269 with RSPO2 revealed reduced *MUC5A/C* expression, while the expression of *MUC5B*  
270 was elevated (**Supplemental Figure S5F,G**). Nevertheless, immunofluorescent staining  
271 did not detect an increase in epithelial cells staining for MUC5B (**Supplemental Figure**  
272 **S5H**). In summary, our data revealed that  $\Delta$ N-TP63 was necessary and sufficient to  
273 inhibit differentiation of mucociliary epithelial cell types from BCs in response to

274 canonical Wnt activation, without the need for Goblet cell hyperplasia. Furthermore, our  
275 results suggested that prolonged overactivation of Wnt signaling could lead to BC  
276 hyperplasia and long-term remodeling of the airway epithelium.

277

278 *ΔN-Tp63 and Wnt signaling are required for maintenance of BCs and correct cell type*  
279 *composition in mucociliary epithelia*

280 While our results argued for an important role for ΔN-TP63 in BCs of mucociliary  
281 epithelia, we found it astonishing that developmental loss of ΔN-TP63 in mammals  
282 (Daniely et al., 2004) and *Xenopus* (this study) still allowed for the formation of a  
283 mucociliary epithelium. We therefore tested how *ΔN-tp63* knockdown affected the  
284 mucociliary epidermis in more detail. In contrast to MCCs and Ionocytes, which  
285 intercalate early (st. 25) and are fully mature by st. 30, SSCs appear and mature slightly  
286 later (Walentek et al., 2014), resulting in approximately equal numbers of MCCs,  
287 Ionocytes and SSCs in the mucociliary epidermis by st. 34 (**Figure 4C**) (Walentek,  
288 2018). Injections of *ΔN-tp63* MO and subsequent analysis of cell type-composition at st.  
289 34 revealed a moderate increase in MCCs and Ionocytes, but a significant decrease in  
290 SSCs (**Figure 4A,C,D**). These results suggested that premature release of BCs into  
291 differentiation could have reduced the availability of BCs during later stages of SSC  
292 specification. Therefore, we tested if SSCs are indeed specified after MCCs and  
293 Ionocytes or if their late appearance in the epithelium could be a consequence of  
294 prolonged differentiation or slower intercalation. For that, embryos were treated with  
295 BIO, starting at st. 11. This later stimulation of Wnt/β-catenin signaling resulted in  
296 almost normal MCC and Ionocyte numbers, but completely inhibited the appearance of  
297 SSCs (**Figure 4B-D**). These data strongly indicated that SSCs were derived from the  
298 same BC progenitor pool during development as MCCs and Ionocytes, and that SSCs  
299 were specified later. To test if *Xenopus* BCs were lost by *ΔN-tp63* MO, we generated  
300 mucociliary organoids from *Xenopus* animal cap explants, providing pure mucociliary  
301 tissue for RNA-sequencing (RNA-seq) (Walentek and Quigley, 2017). Organoids were  
302 generated from control and *ΔN-tp63* morphant embryos and collected for total RNA



303 extraction at early (st. 10) and late (st. 17) cell fate-specification stages as well as after  
304 specification was completed (st. 25). RNA-seq and differential expression analysis  
305 revealed significant differences in gene expression between control and  $\Delta N$ -*tp63*  
306 morphant samples, and the most differentially expressed genes were detected at st. 25  
307 (243 genes with P-adj<0.05; **Supplementary Figure S6A and Table 1**) (Love et al.,  
308 2014). Among significantly upregulated genes, we found MCC and Ionocyte genes  
309 including *mcidas*, *ccno*, *cdc20b*, *foxn4* and *foxi1*, and Go-term analysis indicated  
310 enrichment for “multi-ciliated epithelial cell differentiation” (**Supplemental Table 1 and**  
311 **Figure S6B**) (Mi et al., 2013; Walentek and Quigley, 2017). In contrast, Go-term  
312 analysis of significantly downregulated genes identified an enrichment for the terms  
313 “focal adhesion”, “actin cytoskeleton” and “extracellular matrix” (**Supplemental Figure**  
314 **S6B**). These terms were also found to be enriched within the human airway BC  
315 transcriptome, suggesting loss of BCs (Hackett et al., 2011). Next, we compared the list  
316 of differentially expressed genes in  $\Delta N$ -*tp63* morphants with the human airway BC  
317 transcriptome and identified 41 dysregulated *Xenopus* homologues, including multiple  
318 regulators of proliferation and of cell/extracellular matrix interactions (**Figure 4E**). We  
319 subjected their and  $\Delta N$ -*tp63*'s relative expression values (log<sub>2</sub> fold-change relative to  
320 controls) to hierarchical clustering. In our analysis, we also included a subset of  
321 previously identified *Xenopus* core MCC and Ionocyte markers as well as known  
322 markers for SSCs and Goblet/outer-layer cells (Dubaiissi et al., 2014; Hayes et al., 2007;  
323 Quigley and Kintner, 2017). The two clusters representing the most upregulated genes  
324 over developmental time in  $\Delta N$ -*tp63* morphants contained key markers for MCCs (e.g.  
325 *mcidas*, *ccno*, *cdc20b*, *foxj1*, *myb*) and Ionocytes (e.g. *foxi1*, *atp6* subunits, *ca12*, *ubp1*)  
326 (**Figure 4E**). In contrast, the cluster representing the most downregulated genes over  
327 developmental time contained exclusively BC markers (e.g.  $\Delta N$ -*tp63*, *itga3/6*, *itgb1*,  
328 *lamb1*, *cav2*), and the key transcription factor for SSC specification *foxa1* (**Figure 4E**).  
329 Together, these data not only revealed a high degree of functional and transcriptional  
330 homology between human and *Xenopus* mucociliary BCs, but also demonstrated that  
331  $\Delta N$ -*tp63* was necessary for the maintenance of BCs during development, which was in  
332 turn required to generate a normal cell type-composition in the mucociliary epidermis.  
333 Furthermore, these data were in line with previous work, demonstrating that loss of  $\Delta N$ -



334 TP63 impaired regeneration and induced senescence in human ALI cultures (Arason et  
335 al., 2014). Therefore, we wondered if elevated Wnt/ $\beta$ -catenin signaling in the airway  
336 basal compartment was required for the maintenance  $\Delta N$ -TP63 expression and BCs in  
337 human cells after epithelialization as well. To test this, we inhibited Wnt/ $\beta$ -catenin  
338 signaling by addition of human recombinant DKK1 protein (DKK1) to the medium of  
339 differentiating BCI ALI cultures starting at ALI day 7. Quantification of cell type markers  
340 and mRNA expression levels by immunofluorescence and qPCR showed a moderate  
341 increase in MCCs and Club cells and a relative decrease in BCs in DKK1-treated  
342 cultures, but not a long-term loss of BCs (**Figure 5B-F**). Furthermore, proliferation and  
343 the total number of epithelial cells remained unchanged, and Mucin production was not  
344 inhibited after DKK1 treatment (**Supplemental Figure S6C-H**). These data indicated  
345 that Wnt/ $\beta$ -catenin regulated the decision between BC identity and differentiation into  
346 epithelial cell types, but that it was dispensable in later phases of *in vitro* regeneration  
347 for maintenance of  $\Delta N$ -TP63 expression and BCs. In summary, our experiments  
348 demonstrated that  $\Delta N$ -TP63 was a master transcription factor in BCs regulating the  
349 decision between differentiation and basal stem cell fate in vertebrate mucociliary  
350 epithelia, and that Wnt/ $\beta$ -catenin was required for maintaining  $\Delta N$ -TP63 expression and  
351 BCs during development, but not in later phases of regeneration.

352

### 353 *Wnt/ $\beta$ -catenin-induced block of differentiation is reversible*

354 Given the importance of correctly regulated Wnt/ $\beta$ -catenin signaling for BCs as well as  
355 for the generation of correct cell type-composition in mucociliary epithelia, we were  
356 interested to elucidate if prolonged exposure to elevated Wnt signaling would alter BC  
357 behavior rendering them incompetent to (re-)generate a normal mucociliary epithelium.  
358 To address that, we treated *Xenopus* embryos with BIO starting at st. 8, but removed  
359 the drug from the medium at various stages and assessed cell type composition by  
360 immunofluorescence and ISH. Treatment with BIO from st. 8 until st. 30 caused reduced  
361 MCC, Ionocyte and SSC numbers, which recovered after wash-out of the drug and  
362 subsequent regeneration until st. 33 (**Figure 6A and Supplementary Figure S7A**).

363 Similarly, treatment with BIO from st. 8 until st. 17 confirmed reduced expression of cell  
364 type specification markers as well as a thickening of the  $\Delta N$ -*tp63* expressing sensorial  
365 layer. Removal of the drug at st. 17 and regeneration until st. 25 brought back the  
366 expression of epithelial cell type markers and reduced sensorial layer thickness and  $\Delta N$ -  
367 *tp63* expression, close to normal levels (**Figure 6B and Supplementary Figure S7B-**  
368 **D**). To test if this remarkable regenerative ability was limited to *Xenopus* development,  
369 we conducted analogous experiments in BCI ALI cultures. BCI cultures were treated  
370 with RSPO2 from ALI day 7 until day 21, resulting in deficient formation of MCCs and  
371 Club cells. Then, RSPO2 was removed from the medium and BCIs were allowed to  
372 recover for 7 days. After removal of RSPO2, BCIs were able to successfully regenerate  
373 MCCs and Club cells and to express cell type markers for epithelial cell types, without  
374 drastic changes in proliferation or epithelial cell numbers (**Figure 6C and**  
375 **Supplementary Figure S8A-E**). Additionally, orthogonal optical sections of RSPO2-  
376 treated BCIs after recovery revealed a normalization of epithelial thickness and KRT5  
377 staining (**Figure 6D,E**). Collectively, our work revealed that excessive levels of Wnt  
378 signaling cause overactivation of  $\Delta N$ -TP63 and block specification of epithelial cell types  
379 in a reversible manner, without altering the potential of BCs to form MCCs and secretory  
380 cells.

381

382

## 383 Discussion

384 Our work demonstrates a requirement for dynamically regulated Wnt/ $\beta$ -catenin signaling  
385 in multiciliated (MCCs) and Basal (BCs) cells of the developing and regenerating  
386 mucociliary epithelium as well as a pro-proliferative effect of Wnt/ $\beta$ -catenin in  
387 mucociliary epithelia. Elevated Wnt/ $\beta$ -catenin signaling blocks cell fate specification of  
388 ciliated and secretory cells from BCs, while Wnt signaling during stages of differentiation  
389 promotes MCCs differentiation and ciliogenesis.

390 In BCs, high Wnt/ $\beta$ -catenin levels promote the expression of  $\Delta N$ -*tp63*, a hallmark  
391 marker for BCs in various epithelia, including the mammalian respiratory tract (Hogan et

392 al., 2014; Soares and Zhou, 2018; Zuo et al., 2015). We also provide evidence that  $\Delta N$ -  
393 *tp63* is necessary and sufficient to promote BC fate and to inhibit specification into  
394 mature epithelial cells, including MCCs and secretory cells.  $\Delta N$ -*tp63* was previously  
395 shown to be directly regulated by  $\beta$ -catenin in ChIP-seq studies in mammals and  
396 *Xenopus* and by promoter analysis (Kjolby and Harland, 2017; Ruptier et al., 2011).  $\Delta N$ -  
397 *tp63* is also known to inhibit differentiation and to promote proliferation in various  
398 cancers as well as in skin BCs (keratinocytes); in part this is regulated by transcription  
399 of cell cycle and pro-proliferative genes, which are also regulated by  $\Delta N$ -*tp63* in  
400 *Xenopus* (Chen et al., 2018; Soares and Zhou, 2018). Thus, our work provides a  
401 mechanistic explanation for the negative effects of elevated Wnt/ $\beta$ -catenin on  
402 mucociliary differentiation reported in multiple studies and implicates  $\Delta N$ -*tp63* as  
403 potential driver of proliferation after mucociliary injury. Interestingly,  $\Delta N$ -*tp63* is not  
404 required for initial formation of a mucociliary epithelium during development (Daniely et  
405 al., 2004). Nevertheless, we found that  $\Delta N$ -*tp63* expression is required for maintenance  
406 of BCs and that a loss of  $\Delta N$ -*tp63* leads to excessive cell fate specification and  
407 differentiation of MCCs and Ionocytes causing a deficiency in late-specified SSCs in the  
408 *Xenopus* epidermis, thereby, altering mucociliary cell type composition. Similar  
409 observations were made in developing *tp63*<sup>-/-</sup> mice, in which airway mucociliary epithelia  
410 formed during development, but those epithelia presented an excess of MCCs and a  
411 loss of BCs (Daniely et al., 2004). Furthermore, knockdown of *TP63* in ALI cultures of  
412 human airway cells prevents regeneration and causes senescence, indicating loss of  
413 stemness (Arason et al., 2014). Collectively, these findings support the conclusion that  
414  $\Delta N$ -*tp63* is a Wnt/ $\beta$ -catenin-regulated master transcription factor in BCs, deciding  
415 between BC maintenance and differentiation. Interestingly, Wnt/ $\beta$ -catenin is dispensable  
416 to maintain  $\Delta N$ -*TP63* and BCs after epithelialization in regenerating BCIs, suggesting  
417 that  $\Delta N$ -*TP63* can be maintained by other pathways when BCs are confluent. This could  
418 be achieved by Notch signaling, which was previously shown to regulate BCs (Rock et  
419 al., 2011), but requires cell-cell contact provided by a sufficient density of cells.  
420 Furthermore, our data demonstrate a deep evolutionary conservation of signaling and  
421 regulatory mechanisms across vertebrate mucociliary epithelia, establish the *Xenopus*

422 epidermis as a new model to study BCs *in vivo*, and provide a set of conserved BC  
423 genes, which can be used as BC markers in *Xenopus* and studied mechanistically in the  
424 future.

425 In MCCs, Wnt/ $\beta$ -catenin signaling during differentiation stages is required for normal  
426 ciliation. These results are in line with previous work demonstrating that Wnt/ $\beta$ -catenin  
427 signaling is necessary for normal ciliogenesis in various vertebrate systems by co-  
428 regulating *foxj1*, a master transcription factor for motile cilia (Caron et al., 2012; Sun et  
429 al., 2019; Walentek et al., 2015). The positive effect of Wnt/ $\beta$ -catenin on MCC  
430 specification suggested by some studies could be explained by the extensive positive  
431 cross-regulation between transcription factors expressed in MCCs. The  
432 multiciliogenesis cascade is initiated by a transcriptional regulatory complex consisting  
433 of Multicilin (encoded by *mcidas*), E2f4/5 and TfDp1, which activates expression of the  
434 downstream transcription factors *foxj1*, *rxf2/3*, *myb*, *tp73* and *foxn4* (Quigley and  
435 Kintner, 2017; Stubbs et al., 2012; Walentek and Quigley, 2017). These transcription  
436 factors generate a positive feedback on their expression (Choksi et al., 2014; Quigley  
437 and Kintner, 2017). This positive cross-regulation was especially well demonstrated for  
438 FOXJ1 and RFX2/3, and argues for the possibility that activation of *FOXJ1* could  
439 ultimately lead to activation of the multiciliogenesis cascade (Didon et al., 2013).  
440 Additionally, we have previously found that *myb* expression is downregulated after  
441 inhibition of Wnt/ $\beta$ -catenin signaling, suggesting that *myb* could be regulated by Wnt  
442 signaling as well (Tan et al., 2013; Walentek et al., 2015). Thus, different levels and  
443 timing of Wnt/ $\beta$ -catenin signaling activation could provide an explanation as to why  
444 some studies reported negative effects on MCC formation, while others described an  
445 increase in MCC numbers.

446 Our data argue that the loss of differentiated MCCs upon excessive Wnt activation is a  
447 consequence of impaired specification, rather than Goblet cell hyperplasia as previously  
448 suggested (Mucenski et al., 2005). While we did not observe an increase in MUC5B  
449 expressing cells in the epithelium after Wnt activation, we did detect elevated *MUC5B*  
450 expression levels. This suggests potential induction of subepithelial Goblet cell

451 formation *in vitro* after overactivation of Wnt/ $\beta$ -catenin signaling, similar to the induction  
452 of Goblet cells in submucosal glands (Driskell, 2004).

453 Finally, our data indicate that persistent Wnt/ $\beta$ -catenin activation in mucociliary epithelia  
454 could lead to BC hyperplasia and a remodeling of the epithelium. Importantly, we show  
455 that these effects are reversible and that a return to normal signaling levels can promote  
456 re-establishment of a differentiated epithelium. This is an important notion in the context  
457 of chronic lung diseases, such as COPD, which are also associated with defective  
458 epithelial differentiation, BC hyperplasia, altered Wnt ligand expression, and  
459 overactivation of the Wnt/ $\beta$ -catenin pathway (Baarsma and Königshoff, 2017; Chen et  
460 al., 2010; Heijink et al., 2013; Königshoff et al., 2008). Furthermore, it was shown that  
461 nasal polyps from chronic rhinosinusitis patients produce excess levels of WNT3a and  
462 MCC differentiation is inhibited, but that MCC formation could be rescued by application  
463 of a Wnt-inhibitor (Dobzanski et al., 2018). Together, these findings suggest that even in  
464 a chronically pathogenic state, targeted Wnt/ $\beta$ -catenin signaling inhibition could provide  
465 a potential avenue for treatment of patients with COPD and other chronic lung diseases,  
466 for which treatment options are currently limited or absent.

467

468

469

## 470 **Acknowledgements**

471 We thank: S. Schefold, D. and E. Pangilinan, J. Groth for technical help; R. Kjolby, W.  
472 Finkbeiner, C. Boecking, G. Pyrowolakis, L. Kodjabachian, R. Harland, B. Gomperts for  
473 discussions and sharing of unpublished results; R. Crystal and M. Walters for BCi-  
474 NS1.1 cells; T. Kwon and S. Medina Ruiz for genome annotation files; NXR  
475 (RRID:SCR\_013731), Xenbase (RRID:SCR\_004337), EXRC for Xenopus resources;  
476 Transcriptome and Genome Analysis laboratory Göttingen for deep sequencing; Light  
477 Imaging Center Freiburg for microscope use; JAX (RRID:SCR\_004633) for mice;  
478 Galaxy Europe for bioinformatics platform.

479 This study was supported by the German Research Foundation (DFG) under the Emmy  
480 Noether Programme (grant WA3365/2-1) and under Germany's Excellence Strategy  
481 (CIBSS – EXC-2189 – Project ID 390939984) as well as by an NHLBI Pathway to  
482 Independence Award (K99HL127275) to PW. Generation of transgenic *Xenopus* was  
483 supported by FWO-Vlaanderen grant G029413N and by the Concerted Research  
484 Actions from Ghent University (BOF15/GOA/011) to KV. DIS was supported by the  
485 URAP program and a Pergo Foundation SURF L&S Fellowship.

486

487

#### 488 **Author contributions**

489 MH, DIS, MB, AT, PW: *Xenopus* experiments.

490 JLGV, AT, PW: tissue culture experiments.

491 JLGV, PW: mouse Wnt-reporter analysis.

492 HTT, KV: generated *Xenopus laevis* Wnt reporter line.

493 OS, PW: bioinformatics.

494 MH, PW: experimental design and planning.

495 PW: study design and supervision, coordinating collaborative work, manuscript  
496 preparation.

497

498

#### 499 **Declaration of interests**

500 The authors declare no competing interests.

501

502

#### 503 **Figure Legends**

504

505 **Figure 1: Wnt/ $\beta$ -catenin signaling is active in MCCs and basal progenitors**

506 **(A)** Analysis of Wnt/ $\beta$ -catenin activity in the *X. laevis* mucociliary epidermis using the

507 pbin7LEF:dGFP reporter line (green). Nuclei are stained by DAPI (blue). Red  
508 arrowheads indicate GFP-positive cells in the outer epithelial layer. Dashed lines outline  
509 the epidermal layers. Embryonic stages (st. 8-33) are indicated. **(B)** Analysis of Wnt/ $\beta$ -  
510 catenin activity in the mouse developing airway mucociliary epithelium using the  
511 TCF/LEF:H2B-GFP reporter line (green). Nuclei are stained by DAPI (blue) and MCCs  
512 are marked by Acetylated- $\alpha$ -tubulin (Ac.- $\alpha$ -tubulin, magenta) staining. Dashed lines  
513 outline the epithelium. Embryonic (E14.5-18.5) / post-natal (P1-7) stages are indicated.  
514 **(C)** En-face imaging of the mature *Xenopus* epidermis at st. 33 shows elevated  
515 signaling levels (green) in MCCs (Ac.- $\alpha$ -tubulin, blue). SSCs (5HT, blue). Cell  
516 membranes are visualized by Actin staining (magenta). **(D)** Immunostaining for Ac.- $\alpha$ -  
517 tubulin (magenta) and nuclei (DAPI, blue) shows high levels of Wnt signaling (green) in  
518 cells with BC morphology and intermediate signaling levels in differentiating MCCs. **(E)**  
519 Morpholino-oligonucleotide (MO) knockdown of  $\beta$ -catenin in *Xenopus* increases MCC  
520 numbers (Ac.- $\alpha$ -tubulin, green), but MCCs present fewer and shorter cilia than controls  
521 (ctrl.). Actin staining (magenta). Insets indicate locations of magnified areas I-IV.  
522 **(Related to Supplementary Figures S1 and S2)**

523

524

525 **Figure 2:  $\Delta N$ -tp63 mediates Wnt/ $\beta$ -catenin-induced inhibition of cell fate**  
526 **specification in *Xenopus***

527 **(A-D)** BIO treatments from st. 8-17 or st. 8-30. DMSO was used as vehicle control. **(A)**  
528 Confocal imaging shows Wnt/ $\beta$ -catenin signaling-activation (green) and thickening of  
529 the epidermis in BIO treated embryos. Nuclei (DAPI, blue). DMSO (N=2), BIO (N=2).  
530 **(B)** *In situ hybridization* (ISH) shows increased intensity and thickness of the  $\Delta N$ -tp63  
531 expression domain in BIO treated whole mounts (upper row) and transversal sections  
532 (bottom row). **(C)** BIO treatment reduces MCC (Ac.- $\alpha$ -tubulin, green), Ionocyte (no  
533 staining, black), and SSC (large vesicles, PNA staining, magenta) numbers in confocal  
534 micrographs. Actin staining (green).  $\Delta N$ -tp63 MO in controls leads to increased MCCs  
535 and Ionocytes, while  $\Delta N$ -tp63 MO in BIO treated embryos rescues MCC and Ionocyte  
536 formation. **(D)** ISH reveals reduced MCC numbers (*foxj*+ cells) after BIO treatment,



537 while unilateral knockdown of  $\Delta N$ -*tp63* in control treated embryos leads to more *foxj*+  
538 cells and rescues *foxj*+ cell number in BIO treated embryos. DMSO (N=5), BIO (N=7),  
539 DMSO+ $\Delta N$ -*tp63* MO (N=5), BIO+ $\Delta N$ -*tp63* MO (N=4). Injected side is indicated by red  
540 arrowhead. Dashed lines indicate epidermal area in BIO treated embryos. **(E)**  
541 Overexpression of *gfp- $\Delta N$ -tp63* mRNA leads to nuclear localization of the protein  
542 (green) and reduced MCC (Ac- $\alpha$ -tubulin, blue) numbers at st. 30. Actin staining  
543 (magenta). Differentiated MCCs in injected specimens show no nuclear GFP signal  
544 (asterisks), indicating that they were not targeted. Magnified areas I-II are indicated. **(F)**  
545 ISH for *foxj1* at st. 17 shows reduced MCCs in  $\Delta N$ -*tp63* mRNA injected embryos.  
546 **(Related to Supplementary Figures S3 and S4)**

547

548

### 549 **Figure 3: Wnt/ $\beta$ -catenin signaling inhibits differentiation and promotes stemness** 550 **in human BCs**

551 **(A-F)** Human immortalized BC (BCIs) kept in air-liquid interface (ALI) culture for up to 4  
552 weeks. Human recombinant R-spondin2 (RSPO2) was used to activate Wnt/ $\beta$ -catenin  
553 signaling starting at ALI day 7 (D7). N=3 cultures per timepoint and treatment. **(A)**  
554 Confocal imaging of specimens stained for Ac- $\alpha$ -tubulin (MCCs, blue), CC10 (Club  
555 cells, green) and Actin (cell membranes, magenta) show reduced MCC and Club cell  
556 numbers in RSPO2-treated cultures. **(B)** RSPO2 does not reduce the number of TP63+  
557 (green) cells. Nuclei (DAPI, blue). **(C)** Quantification from (A,B). Mann Whitney test, not  
558 significant, ns =  $P > 0.05$ ; \* =  $P \leq 0.05$ ; \*\* =  $P \leq 0.01$ ; \*\*\* =  $P \leq 0.001$ . **(D)** Quantitative RT-  
559 PCR (qPCR). Expression levels are depicted relative to stage controls. RSPO2 reduces  
560 expression of MCC (*FOXJ1*, *MCIDAS*) and Club cell (*SCGB1A1*) markers, but  
561 increases expression of BC markers (*TP63*, *KRT5*). Student's t-test, not significant, ns =  
562  $P > 0.05$ ; \* =  $P \leq 0.05$ ; \*\* =  $P \leq 0.01$ ; \*\*\* =  $P \leq 0.001$ . **(E,F)** Optical orthogonal sections of  
563 confocal images. RSPO2-treated cultures display increased epithelial thickness and  
564 cells staining for BC markers TP63 (green, in E) and KRT5 (green, in F). **(Related to**  
565 **Supplemental Figure S5)**

566

567

568 **Figure 4: Knockdown of  $\Delta N$ -tp63 stimulates MCC and Ionocyte specification at the**  
569 **expense of BC and SSCs in *Xenopus***

570 **(A-D)** Analysis of cell type composition by confocal microscopy and staining for MCCs  
571 (Ac.- $\alpha$ -tubulin, green), Ionocytes (no staining, black), SSCs (large vesicles, PNA  
572 staining, magenta) and outer/Goblet cells (small granules, PNA staining, magenta) at st.  
573 34 (A) and st. 30 (B). Actin staining (green). **(A)**  $\Delta N$ -tp63 MO increases MCC and  
574 Ionocyte numbers, but reduces numbers of SSCs. **(B)** BIO application from st. 11 does  
575 not affect MCC and Ionocyte numbers, but prevents specification of SSCs. **(C,D)**  
576 Quantification from (A,B). Mann Whitney test, not significant, ns =  $P > 0.05$ ; \* =  $P \leq 0.05$ ; \*\*  
577 =  $P \leq 0.01$ ; \*\*\* =  $P \leq 0.001$ . **(E)** RNA-sequencing at st.10, 17 and 25 on *Xenopus*  
578 mucociliary organoids comparing controls to  $\Delta N$ -tp63 MO injected. N=3 per stage and  
579 treatment. Heatmap and hierarchical clustering of log<sub>2</sub> fold changes (fc) in cell type  
580 gene expression in  $\Delta N$ -tp63 morphants relative to controls. “Upregulated” clusters (red),  
581 “downregulated” cluster (blue). **(Related to Supplemental Figure S6)**

582

583

584 **Figure 5: Inhibition of Wnt/ $\beta$ -catenin signaling transiently reduces stemness and**  
585 **promotes differentiation in human BCs**

586 **(A-F)** BCIs in ALI culture for up to 4 weeks. Human recombinant DKK1 (DKK1) was  
587 used to inhibit Wnt/ $\beta$ -catenin signaling starting at ALI day 7 (D7). **(A)** Confocal imaging  
588 of specimens stained for Ac.- $\alpha$ -tubulin (MCCs, blue), CC10 (Club cells, green) and Actin  
589 (cell membranes, magenta) shows moderately increased MCC and Club cell numbers  
590 after DKK1 treatment. **(B)** DKK1 leads to a transient decrease in BCs, but does not lead  
591 to loss of TP63+ (green) cells. Nuclei (DAPI, blue). **(C)** Quantification from (A,B). Mann  
592 Whitney test, not significant, ns =  $P > 0.05$ ; \*\*\* =  $P \leq 0.001$ . **(D)** qPCR expression levels  
593 are depicted relative to stage controls. DKK1 increases expression of MCC (*FOXJ1*,  
594 *MCIDAS*) and to a lesser extent Club cell (*SCGB1A1*) markers, but without reduction of  
595 BC markers (*TP63*, *KRT5*). Student’s t-test, not significant, ns =  $P > 0.05$ ; \* =  $P \leq 0.05$ ; \*\*  
596 =  $P \leq 0.01$ . **(E,F)** Optical orthogonal sections of confocal images after staining for BC  
597 markers TP63 (green, in E) and KRT5 (green, in F). **(Related to Supplemental Figure**  
598 **S6)**

599

600

601 **Figure 6: Wnt/ $\beta$ -catenin-induced increase in BCs and loss of epithelial**  
602 **differentiation are reversible**

603 **(A,B)** In *Xenopus*, BIO treatments from st. 8-17 or st. 8-30 inhibit differentiation as  
604 compared to DMSO treated controls, but the epithelium can regenerate after removal of  
605 BIO and recovery until st. 33 (A) or st. 25 (B). **(A)** BIO treatment reduces MCC (Ac.- $\alpha$ -  
606 tubulin, green), Ionocyte (no staining, black), and SSC (large vesicles, PNA staining,  
607 magenta) numbers in confocal micrographs at st. 28, which recover after regeneration  
608 until st. 33. Actin staining (green). **(B)** ISH shows reduction in *foxj1* expressing cells and  
609 an increase in  $\Delta N$ -tp63 expression in BIO treated whole mounts (upper row) and  
610 transversal sections (bottom row) at st. 17, which both recover after regeneration until  
611 st. 25. DMSO (N=5), BIO st.17 (N=5), DMSO st.25 (N=5), BIO+recovery st.25 (N=5) **(C)**  
612 Confocal imaging of specimens stained for Ac.- $\alpha$ -tubulin (MCCs, blue), CC10 (Club  
613 cells, green) and Actin (cell membranes, magenta) show reduced MCC and Club cell  
614 numbers in RSPO2-treated cultures from ALI D7 – D21, but regeneration of MCCs and  
615 Club cells at ALI D28. N=3 cultures per timepoint and treatment (upper panels). No loss  
616 of TP63+ (green) BCs is observed in these experiments (bottom panels). Nuclei (DAPI,  
617 blue). **(D,E)** Optical orthogonal sections of confocal images. RSPO2-treated cultures  
618 display normalized epithelial thickness and staining for BC markers TP63 (green, in D)  
619 and KRT5 (green, in E) after regeneration at ALI D28. **(Related to Supplemental**  
620 **Figures S7 and S8)**

621

622

623 **STAR Methods**

624

625 **Contact for reagent and resource sharing**

626 Further information and requests for resources and reagents should be directed to and  
627 will be fulfilled by the Lead Contact, Peter Walentek ([peter.walentek@medizin.uni-](mailto:peter.walentek@medizin.uni-freiburg.de)  
628 [freiburg.de](mailto:peter.walentek@medizin.uni-freiburg.de)).

629

630 Immortalized human Basal cells (BCIs) were generated and are distributed by the  
631 Crystal laboratory at Genetic Medicine/Joan and Sanford I. Weill Department of  
632 Medicine, Weill Cornell Medical School, New York, USA. Sharing of this resource is  
633 subject to an MTA.

634

635 The Wnt reporter line *Xla.Tg(WntREs:dEGFP)<sup>Vlemx</sup>* was obtained from the National  
636 Xenopus Resource (NXR) at Marine Biological Laboratory, Woods Hole, USA, and the  
637 European Xenopus Resource Centre (EXRC) at University of Portsmouth, School of  
638 Biological Sciences, UK. Sharing of this resource is subject to an MTA.

639

640

## 641 **Experimental models and subject details**

### 642 **Xenopus laevis**

643 Wildtype and transgenic *Xenopus laevis* were obtained from the National Xenopus  
644 Resource (NXR) at Marine Biological Laboratory, Woods Hole, USA, and the European  
645 Xenopus Resource Centre (EXRC) at University of Portsmouth, School of Biological  
646 Sciences, UK. Frog maintenance and care was conducted according to standard  
647 procedures and based on recommendations provided by the international Xenopus  
648 community resource centers NXR and EXRC as well as by Xenbase (xenbase.org). All  
649 experiments were conducted in embryos derived from at least two different females and  
650 independent in vitro fertilizations.

651

### 652 **Mice**

653 Mice from the strain TCF/Lef1-HISTH2BB/EGFP (61Hadj/J) (Ferrer-Vaquero et al., 2010)  
654 were obtained from the Jackson Laboratories (JAX) and genotyped using the protocol  
655 deposited under [jax.org/strain/013752](http://jax.org/strain/013752). Reporter analysis was conducted on tissues  
656 derived from male and female animals and no differences were observed between the  
657 sexes. Animal care was conducted by centralized facilities and according to standard  
658 procedures.

659

### 660 **Immortalized human Basal cells (BCIs)**

661 BCIs were generated as described in (Walters et al., 2013) and were provided by the  
662 Crystal laboratory. All experiments were conducted on cells derived from the same  
663 passage (passage 10). Expansion and ALI cultures of BCIs were conducted according  
664 to (Walters et al., 2013) at 37 °C.

665

### 666 **Ethics statements on animal experiments**

667 This work was done in compliance with German animal protection laws and was  
668 approved under Registrier-Nr. X-18/02F and G-18/76 by the state of Baden-  
669 Württemberg, as well as with approval of University of California, Berkeley's Animal  
670 Care and Use Committee. University of California Berkeley's assurance number is  
671 A3084-01, and is on file at the National Institutes of Health Office of Laboratory Animal  
672 Welfare.

673

674

### 675 **Method details**

#### 676 **Manipulation of *Xenopus* Embryos, Constructs and In Situ Hybridization**

677 *X. laevis* eggs were collected and *in vitro*-fertilized, then cultured and microinjected by  
678 standard procedures (Sive et al., 2010). Embryos were injected with Morpholino  
679 oligonucleotides (MOs, Gene Tools) and mRNAs at the four-cell stage using a  
680 PicoSpritzer setup in 1/3x Modified Frog Ringer's solution (MR) with 2.5% Ficoll PM 400  
681 (GE Healthcare, #17-0300-50), and were transferred after injection into 1/3x MR  
682 containing Gentamycin. Drop size was calibrated to about 7–8 nL per injection.

683 Morpholino oligonucleotides (MOs) were obtained from Gene Tools targeting *ctnnb1.L*  
684 *and .S* (Heasman et al., 2000), or targeting *ΔN-tp63.L and .S* (this study), and used at  
685 doses ranging between 34 and 51ng (or 4-6pmol).

686

687 *ΔN-tp63* was cloned from total cDNA into pCS107 using *ΔN-tp63-f* and *ΔN-tp63-stop-r*  
688 primers matching NCBI reference sequence XM\_018261616.1. BamH1/Sal1 restriction  
689 enzymes were used for subcloning. A *gfp-ΔN-tp63* fusion construct was generated using  
690 *gfp-f* and *gfp-r*, and BamH1 restriction enzyme to fuse GFP to the N-terminus of pCS107-

691  $\Delta N$ -tp63. A hormone inducible *gfp- $\Delta N$ -tp63-gr* fusion construct was generated using a  
692 non stop-sequence ( $\Delta N$ -tp63-nonstop-r), primers for the GR-domain (Kolm and Sive,  
693 1995) gr-lbd-f and gr-lbd-r, and Sal1 restriction enzymes to fuse the GR domain to the C-  
694 terminus of pCS107-gfp- $\Delta N$ -tp63. All sequences were verified by Sanger sequencing,  
695 and linearized with Asc1 to generate mRNAs (used at 150ng/ $\mu$ l) and pCS107- $\Delta N$ -tp63  
696 with BamH1 to generate an anti-sense probe template.

697  
698 mRNAs encoding membrane-GFP or membrane-RFP or Centrin4-CFP (Antoniades et  
699 al., 2014) were used in some experiments as lineage tracers at 50 ng/ $\mu$ L (not shown).  
700 All mRNAs were prepared using the Ambion mMessage Machine kit using Sp6  
701 (#AM1340).

702  
703 DNAs were purified using the PureYield Midiprep kit (Promega, #A2495) and were  
704 linearized before in vitro synthesis of anti-sense RNA probes using T7 or Sp6  
705 polymerase (Promega, #P2077 and #P108G), RNase Inhibitor (Promega #N251B) and  
706 Dig-labeled rNTPs (Roche, #3359247910 and 11277057001). Embryos were *in situ*  
707 hybridized according to (Harland, 1991), bleached after staining and imaged. Sections  
708 were made after embedding in gelatin-albumin with glutaraldehyde at 50-70 $\mu$ m as  
709 described in (Walentek et al., 2012).

710  
711 Drug treatment of embryos started and ended at the indicated stages. DMSO (Sigma,  
712 #D2650) or ultrapure Ethanol (NeoFroxx #LC-8657.3) were added to the medium as  
713 vehicle controls. 6-Bromoindirubin-3'-oxime (BIO, Sigma-Aldrich/Merck #B1686) was  
714 used in DMSO at 75  $\mu$ M (BIO low) or 150  $\mu$ M (BIO high). Dexamethasone (Sigma-  
715 Aldrich/Merck #D4902) was used in Ethanol at 10 $\mu$ M.

716

717 Morpholino nucleotide and cloning primer sequences:

| Name                                 | Sequence                         |
|--------------------------------------|----------------------------------|
| <i><math>\beta</math>-catenin</i> MO | 5'-TTTCAACCGTTTCCAAAGAACCAGG -3' |
| <i><math>\Delta N</math>-tp63</i> MO | 5'-GATACAACATCTTTGCAGTGAGGTT-3'  |

|                            |                                               |
|----------------------------|-----------------------------------------------|
| $\Delta N$ -tp63-f         | AAAAAAGGATCCATGTTGTATCTGGAAAACAATG            |
| $\Delta N$ -tp63-stop-r    | GTCGACTCATTACCCTCTTCCTTAATAC                  |
| $\Delta N$ -tp63-nonstop-r | GTCGACTTACCCTCTTCCTTAATAC                     |
| gfp-f                      | AAAAAAGGATCCATGGTGAGCAAGGGCGAGGAGCTGTTC       |
| gfp-r                      | AAAAAAGGATCCCTTGTACAGCTCGTCCATGCCATGCCGAGAGTG |
| gr-lbd-f                   | AAAAAGTCGACCCTCTGAAAATCCTGGTAACAAAAC          |
| gr-lbd-r                   | AAAAAGTCGACCCTACACTTTTGTATGAAACAGAAG          |

718

719

### 720 **Generation of the *Xenopus* Wnt/ $\beta$ -catenin signaling reporter line**

721 The Wnt reporter line *Xla.Tg(WntREs:dEGFP)<sup>Vlemx</sup>* was generated using the sperm  
722 nuclear transfer method as described in detail in (Hirsch et al., 2002). The Wnt-  
723 responsive promoter consists of 7 copies of a TCF/LEF1 binding DNA element and a  
724 minimal TATA box and a reporter gene encoding destabilized EGFP and a polyA  
725 sequence. The transgene is flanked on both sides by two copies of the chicken HS4-  
726 core sequence (Tran et al., 2010).

727

### 728 **RNA-sequencing on *Xenopus* mucociliary organoids and bioinformatics analysis**

729 *X. laevis* embryos were either injected 4x into the animal hemisphere at four-cell stage  
730 with  $\Delta N$ -tp63 MO or remained uninjected, and were cultured until st. 8. Animal caps  
731 were dissected in 1x Modified Barth's solution (MBS) and transferred to 0.5x MBS +  
732 Gentamycin (Sive et al., 2010). 10-15 organoids were collected in TRIzol (Thermo  
733 Fisher #15596026) per stage at st. 10.5 (st. 10), st. 16-19 (st. 17) and st. 24-25 (st. 25).  
734 Organoids were derived from 3 independent experiments.

735 500 ng total RNA per sample was used, poly-A selection and RNA-sequencing library  
736 preparation was done using non strand massively-parallel cDNA sequencing (mRNA-  
737 Seq) protocol from Illumina, the TruSeq RNA Library Preparation Kit v2, Set A (Illumina  
738 #RS-122-2301) according to manufacturer's recommendation. Quality and integrity of



739 RNA was assessed with the Fragment Analyzer from Advanced Analytical by using the  
740 standard sensitivity RNA Analysis Kit (Advanced Analytical #DNF-471). All samples  
741 selected for sequencing exhibited an RNA integrity number over 8. For accurate  
742 quantitation of cDNA libraries, the QuantiFluor™dsDNA System from Promega was  
743 used. The size of final cDNA libraries was determined using the dsDNA 905 Reagent Kit  
744 (Advanced Bioanalytical #DNF-905) exhibiting a sizing of 300 bp on average. Libraries  
745 were pooled and paired-end 100bp sequencing on a HiSeq2500 was conducted at the  
746 Transcriptome and Genome Analysis Laboratory, University of Göttingen. Sequence  
747 images were transformed with Illumina software BaseCaller to BCL files, which was  
748 demultiplexed to fastq files with bcl2fastq v2.17.1.14. Quality control was done using  
749 FastQC v0.11.5 (Andrews, Simon (2010). "FastQC a quality-control tool for high-  
750 throughput sequence data" available at  
751 <http://www.bioinformatics.babraham.ac.uk/projects/fastqc>).

752 Sequencing generated a total of 2x 581.7 Mio reads (average 2x 32.3 Mio / library). After  
753 adapter-trimming, paired-end reads were mapped to *Xenopus laevis* genome assembly  
754 v9.2 using RNA STAR v2.6.0b-1 (Dobin et al., 2013). featureCounts v1.6.3 (Liao et al.,  
755 2014) was used to count uniquely mapped reads per gene and statistical analysis of  
756 differential gene expression was conducted in DEseq2 v1.22.1 (Love et al., 2014). Go-  
757 term analysis was done with "humanized" versions of *Xenopus* gene names (by removing  
758 ".L" and ".S" from the name) using the GO Consortium website (geneontology.org).  
759 Heatmaps were generated in R v3.5.1 using ggplot2/heatmap2 v2.2.1. All bioinformatic  
760 analysis was performed on the Galaxy / Europe platform (usegalaxy.eu).

761

762

### 763 **Air-liquid interface (ALI) culture of immortalized human Basal cells (BCIs)**

764 ALI cultures of BCIs were conducted according to (Walters et al., 2013) on Costar  
765 Transwell Filters (Costar #3470), coated with human Type IV Collagen (Sigma #C7521)  
766 dissolved in Acetic acid (Carl Roth #3738.4). For Basal cell expansion the BEGM Bullet  
767 Kit (Lonza #CC-3170) was used with all supplements as recommended by the  
768 manufacturer, but without the antibiotics. Instead Penicillin-Streptomycin (0.5%, Sigma

769 #P4333), Gentamycin sulphate (0.1%, Carl Roth, #2475.1) and Amphotericin B (0.5%,  
770 Gibco #15290-018) were added. Differentiation of cells was conducted in DMEM:F12  
771 (Gibco #11330-032) with UltrosorG (2%, Pall BioSphera-Science #15950-017 dissolved  
772 in sterile cell culture grade water from Gibco #15230-071), and Penicillin-Streptomycin  
773 (0.5%, Sigma #P4333), Gentamycin sulphate (0.1%, Carl Roth, #2475.1) and  
774 Amphotericin B (0.5%, Gibco #15290-018) for up to 28 days. Media were filtered (0.22  
775 µm) before use. Manipulations of Wnt signaling were done by addition of human  
776 recombinant RSPO2 (R&D systems 3266-RS) or human recombinant DKK1 (R&D  
777 systems 5439-DK), which were reconstituted in sterile PBS, pH 7.4 containing 0.1%  
778 bovine serum albumin at 200ng/ml.

779

780

#### 781 **ALI culture of primary mouse tracheal epithelial cells (MTECs)**

782 ALI cultures of MTECs were conducted according to (Vladar and Brody, 2013) on Costar  
783 Transwell Filters (Costar #3470), coated with rat tail Collagen (BD Biosciences #354236)  
784 in Acetic acid. Cells were isolated from TCF/Lef1-HISTH2BB/EGFP (61Hadj/J). The  
785 following reagents and supplements were used as indicated in the protocol:

| Name      | Vendor & P/N                   | Final concentration | Medium                                   |
|-----------|--------------------------------|---------------------|------------------------------------------|
| Pronase   | Roche<br>#10165921001          | 1.5mg/ml            | Pronase solution                         |
| Ham's F12 | Life Technologies<br>#11765054 | -                   | Pronase solution,<br>DNase solution      |
| DNase     | Sigma #DN25                    | 0.5mg/ml            | DNase solution                           |
| DMEM:F12  | Gibco #11330-032               | -                   | Proliferation Medium,<br>Differentiation |

|                          |                                |          |                                                                         |
|--------------------------|--------------------------------|----------|-------------------------------------------------------------------------|
|                          |                                |          | Medium                                                                  |
| Penicillin-Streptomycin  | Sigma #P4333                   | 1%       | Proliferation Medium,<br>Differentiation<br>Medium,<br>Pronase solution |
| Amphotericin B           | Gibco #15290-018               | 0.1%     | Proliferation Medium,<br>Differentiation<br>Medium                      |
| Sodium Bicarbonate       | Life Technologies<br>#25080060 | 0.3%     | Proliferation Medium,<br>Differentiation<br>Medium                      |
| Insulin                  | Sigma #1182                    | 10µg/ml  | Proliferation Medium                                                    |
| Epidermal Growth Factor  | BD Biosciences<br>#354001      | 25µg/ml  | Proliferation Medium                                                    |
| Apo-Transferrin          | Sigma #T1147                   | 5µg/ml   | Proliferation Medium                                                    |
| Cholera toxin            | Sigma #C8052                   | 0.1µg/ml | Proliferation Medium                                                    |
| Bovine pituitary extract | Sigma #SLBV9702                | 30µg/ml  | Proliferation Medium                                                    |
| FBS Superior             | Biochrom #S0615                | 5%       | Proliferation Medium                                                    |
| Retinoic acid            | Sigma #R2625                   | 50nM     | Proliferation Medium,<br>Differentiation<br>Medium                      |
| NuSerum                  | BD Biosciences<br>#355100      | 2%       | Differentiation<br>Medium                                               |

787 Primaria cell culture dishes (Corning #353803) were used for selection during the  
788 procedure. Cells were cultured for up to 21 days.

789

### 790 **Quantitative RT-PCR on cDNAs from BCIs**

791 Before total RNA extraction from BCIs, filters were washed 3x 5 min with PBS and  
792 removed from the insets using a scalpel cleaned with RNase away (Mbp #7002). The  
793 RNeasy Mini Kit (Qiagen #74104) was used, and the cells were collected in RLT buffer +  
794  $\beta$ -Mercaptoethanol (10  $\mu$ l / ml), vortexed for 2 min, and lysed using QIAshredder (Qiagen  
795 #79654) columns. RNA was collected in UltraPure water (Invitrogen #10977-035) and  
796 used for cDNA synthesis with iScript cDNA Synthesis Kit (Bio-Rad #1708891). qPCR-  
797 reactions were conducted using Sso Advanced Universal SYBR Green Supermix (Bio-  
798 Rad #172-5275) on a CFX Connect Real-Time System (Bio-Rad) in 96-well PCR plates  
799 (Brand #781366). Experiments were conducted in biological and technical triplicates and  
800 normalized by *GAPDH* and *ODC* expression levels. Expression levels were analyzed in  
801 Excell and graphs were generated using R.

802 Primers:

| Name      | Sequence               |
|-----------|------------------------|
| foxj1-f   | ATCTACAAGTGGATCACGGAC  |
| foxj1-r   | GAGGCACTTTGATGAAGCAC   |
| tp63-f    | CGTGAGACTTATGAAATGCTG  |
| tp63-r    | TGAAGATGGAGACTGTATTGAG |
| krt5-f    | GCAGTACATCAACAACCTCAG  |
| krt5-r    | CTACATCCTTCTTCAGCATCAC |
| scgb1a1-f | CCTGATCAAGACATGAGGGA   |
| scgb1a1-r | TAATTACACAGTGAGCTTTGGG |

|          |                         |
|----------|-------------------------|
| mcidas-f | TGAGCAATACTGGAAGGAGG    |
| mcidas-r | CCTGTTTCTGGGTCAATGTC    |
| muc5ac-f | GGAAGTTCAACAGCATCCAG    |
| muc5ac-r | GAGCATACTTCTCATTCTCCAC  |
| muc5b-f  | TGTTCTCAACTCCATCTACAC   |
| muc5b-r  | CTGACAAACACCTGCATGAG    |
| gapdh-f  | GGAGCGAGATCCCTCCAAAAT   |
| gapdh-r  | GGCTGTTGTCATACTTCTCATGG |
| odc-f    | TTTACTGCCAAGGACATTCTGG  |
| odc-r    | GGAGAGCTTTTAACCACCTCAG  |

803

804

### 805 **Immunofluorescence Staining and Sample Preparation**

806 Whole *Xenopus* embryos, were fixed at indicated stages in 4% paraformaldehyde at 4 °C  
807 over-night or 2 h at room temperature, then washed 3x 15 min with PBS, 2x 30 min in  
808 PBST (0.1% Triton X-100 in PBS), and were blocked in PBST-CAS (90% PBS containing  
809 0.1% Triton X-100, 10% CAS Blocking; ThermoFischer #00-8120) for 1h at RT. For cryo  
810 sections, embryos were equilibrated in 50% Sucrose at 4 °C over-night, embedded in  
811 O.C.T. cryomedium (Tissue-Tek #25608-930), frozen at -80 °C, and sectioned at 30-  
812 50µm. Immunostaining on sections was done as for whole embryos after initial 3x 15 min  
813 washes with PBS and 15 min re-fixation in 4% paraformaldehyde at RT.

814 Mouse lungs were dissected, washed in ice-cold PBS several times and fixed at  
815 indicated stages in 4% paraformaldehyde at 4 °C for >24 h. The tissue was then  
816 equilibrated in 50% Sucrose at 4 °C over-night, embedded in O.C.T. cryomedium  
817 (Tissue-Tek #25608-930), frozen at -80 °C, and sectioned at 10-14 µm. For  
818 immunostaining, sections were washed 3x 15 min with PBS and re-fixed in 4%

819 paraformaldehyde at RT 15 min followed by 2x 30 min washes in PBST (0.1% Triton X-  
 820 100 in PBS). Samples were blocked in PBST-CAS (90% PBS containing 0.1% Triton X-  
 821 100, 10% CAS Blocking) for 30 min – 1 h at RT.

822 MTEC and BCI cells grown in ALI culture were washed 3x 5 min with PBS before fixation  
 823 in 4% paraformaldehyde at 4 °C for >24 h. The culture filters were removed from the  
 824 insets using a scalpel, divided into multiple parts and used for different combinations of  
 825 stains. Filter parts were washed 2x 30 min in PBST (0.1% Triton X-100 in PBS) and  
 826 blocked in PBST-CAS (90% PBS containing 0.1% Triton X-100, 10% CAS Blocking) for  
 827 30 min – 1 h at RT.

828 Primary antibodies used in this study:

| Name                                     | Vendor & P/N                  | Dilution       | Used in Species | To mark                 |
|------------------------------------------|-------------------------------|----------------|-----------------|-------------------------|
| mouse anti-Acetylated- $\alpha$ -tubulin | Sigma/Merck #T6793            | 1:700 – 1:1000 | XL, HS, MM      | Cilia / MCCs            |
| rabbit anti-GFP                          | Abcam #ab290                  | 1:500          | XL              | GFP+ cells              |
| rabbit anti-Cytokeratin 5                | Thermo Fisher #PA1-37974      | 1:500          | HS              | BCs                     |
| rabbit anti-human Club Cell Protein      | BioVendor #RD181022220-01     | 1:1000         | HS              | Club cells (CC10)       |
| rabbit anti-human p63                    | Proteintech #12143-1-AP       | 1:500          | HS              | BCs                     |
| rabbit anti-mouse Uteroglobin            | Abcam #ab40873                | 1:500          | MM              | Club cells (CC10)       |
| mouse anti-Ki-67                         | Cell Signaling #9449          | 1:1000         | HS              | Proliferating cells     |
| mouse anti-Muc5B                         | Santa Cruz Biotech #sc-393952 | 1:500          | HS              | Mucin 5B / Goblet cells |
| rabbit anti-Serotonin                    | Merk/Milipore #AB938          | 1:500          | XL              | Serotonin / SSCs        |

829  
830 Secondary antibodies (used at 1:250): AlexaFluor 555-labeled goat anti-mouse antibody  
831 (Molecular Probes #A21422), AlexaFluor 488-labeled goat anti-rabbit antibody (Molecular  
832 Probes #R37116), AlexaFluor 488-labeled donkey anti-mouse antibody (Molecular  
833 Probes #R37114), AlexaFluor 405-labeled goat anti-mouse antibody (Molecular Probes  
834 #A-31553). All antibodies were applied in 100% CAS Blocking (ThermoFischer #00-  
835 8120) over night at 4 °C or 2 h at RT (for secondary antibodies). DAPI was used to label  
836 nuclei (applied for 30 min. at room temperature, 1:100 in PBSt; Molecular Probes  
837 #D1306) in *Xenopus*. ProLong Gold Antifade Mountant with DAPI (Molecular Probes  
838 #P36931) was used to label nuclei in mouse and human samples. Actin was stained by  
839 incubation (30-120 min at room temperature) with AlexaFluor 488- or 647-labeled  
840 Phalloidin (1:40 in PBSt; Molecular Probes #A12379 and #A22287), mucus-like  
841 compounds in *Xenopus* were stained by incubation (over night at 4°C) with AlexaFluor  
842 647-labeled PNA (1:1000 in PBSt; Molecular Probes #L32460).

843  
844 **Confocal imaging, image processing and analysis**  
845 Confocal imaging was conducted using a Zeiss LSM700 or Zeiss LSM880 and Zeiss Zen  
846 software. Wnt reporter sections from *Xenopus* and mice were imaged using tile-scans  
847 and images were reconstructed in ImageJ or Adobe Photoshop. Confocal images were  
848 adjusted for channel brightness/contrast and Z-stack projections or orthogonal sections  
849 were generated using ImageJ. A detailed protocol for quantification of *Xenopus*  
850 epidermal cell types was published (Walentek, 2018). Images of embryos after *in situ*  
851 hybridization and corresponding sections were imaged using an AxioZoom setup or  
852 AxioImager.Z1, and images were adjusted for color balance, brightness and contrast  
853 using Adobe Photoshop. Measurement of  $\Delta N$ -tp63 domain thickness in *Xenopus* was  
854 done in ImageJ using the NeuronJ plugin.

855  
856 **Quantification and statistical analysis**  
857 **Statistical Evaluation**



858 Stacked bar graphs were generated in Microsoft Excel, box plots and heatmaps were  
859 generated in R (the line represents the median; 50% of values are represented by the  
860 box; 95% of values are represented within whiskers; values beyond 95% are depicted as  
861 outliers). Statistical evaluation of experimental data was performed using chi-squared  
862 tests (<http://www.physics.csbsju.edu/stats/contingency.html>), Wilcoxon sum of ranks  
863 (Mann-Whitney) tests (<http://astatsa.com/WilcoxonTest/>), or Student's t-test  
864 (<http://www.physics.csbsju.edu/stats/t-test.html>) as indicated in figure legends.

865

### 866 **Sample size and analysis**

867 Sample sizes for all experiments were chosen based on previous experience and used  
868 embryos derived from at least two different females in *Xenopus*. Analysis of mouse Wnt-  
869 reporter was conducted in samples from  $N > 3$  animals. No randomization or blinding was  
870 applied.

### 871 **Use of shared controls**

872 For parts of cell type quantification in *Xenopus* and BCIs, and qPCR experiments in BCIs  
873 shared controls or other conditions were used in multiple figures/graphs. Therefore, a  
874 detailed log of manipulation experiments in *Xenopus* and BCIs is provided in  
875 Supplemental Table 2. It contains information on experiment number, species/model, type  
876 of experiment, conditions, number of specimens, and in which figure/graph the data was  
877 used throughout the manuscript.

878

### 879 **Data and software availability**

880 RNA-seq data have been deposited in the NCBI Gene expression Omnibus (GEO)  
881 database under the ID code: *AWAITING GEO ACCESSION NUMBER*.

882

883

884

885

### 886 **References**

887 Antoniades, I., Stylianou, P., and Skourides, P.A. (2014). Making the Connection: Ciliary

888 Adhesion Complexes Anchor Basal Bodies to the Actin Cytoskeleton. *Dev. Cell* 28, 70–  
889 80.

890 Arason, A.J., Jonsdottir, H.R., Halldorsson, S., Benediktsdottir, B.E., Bergthorsson, J.T.,  
891 Ingthorsson, S., Baldursson, O., Sinha, S., Gudjonsson, T., and Magnusson, M.K.  
892 (2014). DeltaNp63 has a role in maintaining epithelial integrity in airway epithelium.  
893 *PLoS One* 9.

894 Baarsma, H.A., and Königshoff, M. (2017). ‘WNT-er is coming’ □: WNT signalling in  
895 chronic lung diseases. *Thorax* 72, 746–759.

896 Borday, C., Parain, K., Thi Tran, H., Vleminckx, K., Perron, M., and Monsoro-Burq, A.H.  
897 (2018). An atlas of Wnt activity during embryogenesis in *Xenopus tropicalis*. *PLoS One*  
898 13, e0193606.

899 Caron, A., Xu, X., and Lin, X. (2012). Wnt/ -catenin signaling directly regulates Foxj1  
900 expression and ciliogenesis in zebrafish Kupffer’s vesicle. *Development* 139, 514–524.

901 Chen, Y., Peng, Y., Fan, S., Li, Y., Xiao, Z.X., and Li, C. (2018). A double dealing tale of  
902 p63: an oncogene or a tumor suppressor. *Cell. Mol. Life Sci.* 75, 965–973.

903 Chen, Y.T., Gallup, M., Nikulina, K., Lazarev, S., Zlock, L., Finkbeiner, W., and  
904 McNamara, N. (2010). Cigarette smoke induces epidermal growth factor receptor-  
905 dependent redistribution of apical MUC1 and junctional  $\beta$ -catenin in polarized human  
906 airway epithelial cells. *Am. J. Pathol.* 177, 1255–1264.

907 Choksi, S.P., Lauter, G., Swoboda, P., and Roy, S. (2014). Switching on cilia:  
908 transcriptional networks regulating ciliogenesis. *Development* 141, 1427–1441.

909 Cibois, M., Luxardi, G., Chevalier, B., Thome, V., Mercey, O., Zaragosi, L.-E., Barbry,  
910 P., Pasini, A., Marcet, B., and Kodjabachian, L. (2015). BMP signalling controls the  
911 construction of vertebrate mucociliary epithelia. *Development* 142, 2352–2363.

912 Clevers, H. (2006). Wnt/ $\beta$ -Catenin Signaling in Development and Disease. *Cell* 127,  
913 469–480.

914 Daniely, Y., Liao, G., Dixon, D., Linnoila, R.I., Lori, A., Randell, S.H., Oren, M., and

- 915 Jetten, A.M. (2004). Critical role of p63 in the development of a normal esophageal and  
916 tracheobronchial epithelium. *Am. J. Physiol. Physiol.* 287, C171–C181.
- 917 Deblandre, G. a, Wettstein, D.A., Koyano-Nakagawa, N., and Kintner, C. (1999). A two-  
918 step mechanism generates the spacing pattern of the ciliated cells in the skin of  
919 *Xenopus* embryos. *Development* 126, 4715–4728.
- 920 Didon, L., Zwick, R.K., Chao, I.W., Walters, M.S., Wang, R., Hackett, N.R., and Crystal,  
921 R.G. (2013). RFX3 Modulation of FOXJ1 regulation of cilia genes in the human airway  
922 epithelium. *Respir. Res.* 14, 1.
- 923 Dobin, A., Davis, C.A., Schlesinger, F., Drenkow, J., Zaleski, C., Jha, S., Batut, P.,  
924 Chaisson, M., and Gingeras, T.R. (2013). STAR: Ultrafast universal RNA-seq aligner.  
925 *Bioinformatics* 29, 15–21.
- 926 Dobzanski, A., Khalil, S.M., and Lane, A.P. (2018). Nasal polyp fibroblasts modulate  
927 epithelial characteristics via Wnt signaling. *Int. Forum Allergy Rhinol.* 8, 1412–1420.
- 928 Driskell, R.R. (2004). Wnt-responsive element controls Lef-1 promoter expression  
929 during submucosal gland morphogenesis. *AJP Lung Cell. Mol. Physiol.* 287, L752–  
930 L763.
- 931 Dubaissi, E., Rousseau, K., Lea, R., Soto, X., Nardeosingh, S., Schweickert, A., Amaya,  
932 E., Thornton, D.J., and Papalopulu, N. (2014). A secretory cell type develops alongside  
933 multiciliated cells, ionocytes and goblet cells, and provides a protective, anti-infective  
934 function in the frog embryonic mucociliary epidermis. *Development* 141, 1514–1525.
- 935 Ferrer-Vaquer, A., Piliszek, A., Tian, G., Aho, R.J., Dufort, D., and Hadjantonakis, A.K.  
936 (2010). A sensitive and bright single-cell resolution live imaging reporter of Wnt/-catenin  
937 signaling in the mouse. *BMC Dev. Biol.* 10.
- 938 Gomperts, B.N. (2004). Foxj1 regulates basal body anchoring to the cytoskeleton of  
939 ciliated pulmonary epithelial cells. *J. Cell Sci.* 117, 1329–1337.
- 940 Hackett, N.R., Shaykhiev, R., Walters, M.S., Wang, R., Zwick, R.K., Ferris, B., Witover,  
941 B., Salit, J., and Crystal, R.G. (2011). The human airway epithelial basal cell  
942 transcriptome. *PLoS One* 6.

- 943 Harland, R.M. (1991). In Situ Hybridization: an improved whole-mount method for  
944 *Xenopus* embryos. *Methods Cell Biol.* 36, 685–695.
- 945 Hashimoto, S., Chen, H., Que, J., Brockway, B.L., Drake, J.A., Snyder, J.C., Randell,  
946 S.H., and Stripp, B.R. (2012).  $\beta$ -Catenin–SOX2 signaling regulates the fate of  
947 developing airway epithelium. *J. Cell Sci.* 125, 932–942.
- 948 Hayes, J.M., Kim, S.K., Abitua, P.B., Park, T.J., Herrington, E.R., Kitayama, A., Grow,  
949 M.W., Ueno, N., and Wallingford, J.B. (2007). Identification of novel ciliogenesis factors  
950 using a new in vivo model for mucociliary epithelial development. *Dev. Biol.* 312, 115–  
951 130.
- 952 Heasman, J., Kofron, M., and Wylie, C. (2000).  $\beta$ -catenin signaling activity dissected in  
953 the early *Xenopus* embryo: A novel antisense approach. *Dev. Biol.* 222, 124–134.
- 954 Heijink, I.H., De Bruin, H.G., Van Den Berge, M., Bennink, L.J.C., Brandenburg, S.M.,  
955 Gosens, R., Van Oosterhout, A.J., and Postma, D.S. (2013). Role of aberrant WNT  
956 signalling in the airway epithelial response to cigarette smoke in chronic obstructive  
957 pulmonary disease. *Thorax* 68, 709–716.
- 958 Hirsch, N., Zimmerman, L.B., and Grainger, R.M. (2002). *Xenopus*, the next generation:  
959 *X. tropicalis* genetics and genomics. *Dev. Dyn.* 225, 422–433.
- 960 Hogan, B.L.M., Barkauskas, C.E., Chapman, H.A., Epstein, J.A., Jain, R., Hsia, C.C.W.,  
961 Niklason, L., Calle, E., Le, A., Randell, S.H., et al. (2014). Repair and regeneration of  
962 the respiratory system: Complexity, plasticity, and mechanisms of lung stem cell  
963 function. *Cell Stem Cell* 15, 123–138.
- 964 Hou, Z., Wu, Q., Sun, X., Chen, H., Li, Y., Zhang, Y., Mori, M., Yang, Y., Que, J., and  
965 Jiang, M. (2019). Wnt/Fgf crosstalk is required for the specification of basal cells in the  
966 mouse trachea. *Development* 146, dev171496.
- 967 Huang, Y.L., and Niehrs, C. (2014). Polarized Wnt signaling regulates ectodermal cell  
968 fate in *Xenopus*. *Dev. Cell* 29, 250–257.
- 969 Kjolby, R.A.S., and Harland, R.M. (2017). Genome-wide identification of Wnt/ $\beta$ -catenin  
970 transcriptional targets during *Xenopus* gastrulation. *Dev. Biol.* 426, 165–175.

- 971 Kolm, P.J., and Sive, H.L. (1995). Efficient Hormone-Inducible Protein Function in  
972 *Xenopus laevis*. *Dev. Biol.* *171*, 267–272.
- 973 Königshoff, M., Balsara, N., Pfaff, E.M., Kramer, M., Chrobak, I., Seeger, W., and  
974 Eickelberg, O. (2008). Functional Wnt signaling is increased in idiopathic pulmonary  
975 fibrosis. *PLoS One* *3*, 1–12.
- 976 Liao, Y., Smyth, G.K., and Shi, W. (2014). FeatureCounts: An efficient general purpose  
977 program for assigning sequence reads to genomic features. *Bioinformatics* *30*, 923–  
978 930.
- 979 Love, M.I., Huber, W., and Anders, S. (2014). Moderated estimation of fold change and  
980 dispersion for RNA-seq data with DESeq2. *Genome Biol.* *15*, 550.
- 981 Lu, P., Barad, M., and Vize, P.D. (2001). *Xenopus* p63 expression in early ectoderm  
982 and neurectoderm. *Mech. Dev.* *102*, 275–278.
- 983 Mall, M.A. (2008). Role of Cilia, Mucus, and Airway Surface Liquid in Mucociliary  
984 Dysfunction: Lessons from Mouse Models. *J. Aerosol Med. Pulm. Drug Deliv.* *21*, 13–  
985 24.
- 986 Malleske, D.T., Hayes, D., Lallier, S.W., Hill, C.L., and Reynolds, S.D. (2018).  
987 Regulation of Human Airway Epithelial Tissue Stem Cell Differentiation by  $\beta$ -Catenin,  
988 P300, and CBP. *Stem Cells* *36*, 1905–1916.
- 989 Mi, H., Muruganujan, A., Casagrande, J.T., and Thomas, P.D. (2013). Large-scale gene  
990 function analysis with the panther classification system. *Nat. Protoc.* *8*, 1551–1566.
- 991 Mucenski, M.L., Nation, J.M., Thitoff, A.R., Besnard, V., Xu, Y., Wert, S.E., Harada, N.,  
992 Taketo, M.M., Stahlman, M.T., and Whitsett, J.A. (2005).  $\beta$ -Catenin regulates  
993 differentiation of respiratory epithelial cells in vivo. *Am. J. Physiol. Cell. Mol. Physiol.*  
994 *289*, L971–L979.
- 995 Niehrs, C. (2012). The complex world of WNT receptor signalling. *Nat. Rev. Mol. Cell*  
996 *Biol.* *13*, 767–779.
- 997 Pongracz, J.E., and Stockley, R.A. (2006). Wnt signalling in lung development and

- 998 diseases. *Respir. Res.* 7, 1–10.
- 999 Quigley, I.K., and Kintner, C. (2017). Rfx2 Stabilizes Foxj1 Binding at Chromatin Loops  
1000 to Enable Multiciliated Cell Gene Expression. *PLoS Genet.* 13, 1–29.
- 1001 Quigley, I.K., Stubbs, J.L., and Kintner, C. (2011). Specification of ion transport cells in  
1002 the *Xenopus* larval skin. *Development* 138, 705–714.
- 1003 Reynolds, S.D., Zemke, A.C., Giangreco, A., Brockway, B.L., Teisanu, R.M., Drake,  
1004 J.A., Mariani, T., Di, P.Y.P., Taketo, M.M., and Stripp, B.R. (2008). Conditional  
1005 Stabilization of  $\beta$ -Catenin Expands the Pool of Lung Stem Cells. *Stem Cells* 26, 1337–  
1006 1346.
- 1007 Rock, J.R., Onaitis, M.W., Rawlins, E.L., Lu, Y., Clark, C.P., Xue, Y., Randell, S.H., and  
1008 Hogan, B.L.M. (2009). Basal cells as stem cells of the mouse trachea and human  
1009 airway epithelium. *Proc. Natl. Acad. Sci.* 106, 12771–12775.
- 1010 Rock, J.R., Randell, S.H., and Hogan, B.L.M. (2010). Airway basal stem cells: a  
1011 perspective on their roles in epithelial homeostasis and remodeling. *Dis. Model. Mech.*  
1012 3, 545–556.
- 1013 Rock, J.R., Gao, X., Xue, Y., Randell, S.H., Kong, Y.Y., and Hogan, B.L.M. (2011).  
1014 Notch-dependent differentiation of adult airway basal stem cells. *Cell Stem Cell* 8, 639–  
1015 648.
- 1016 Ruptier, C., De Gaspéris, A., Ansieau, S., Granjon, A., Tanière, P., Lafosse, I., Shi, H.,  
1017 Petitjean, A., Taranchon-Clermont, E., Tribollet, V., et al. (2011). TP63 P2 promoter  
1018 functional analysis identifies B-catenin as a key regulator of  $\Delta$ np63 expression.  
1019 *Oncogene* 30, 4656–4665.
- 1020 Schmid, A., Sailland, J., Novak, L., Baumlin, N., Fregien, N., and Salathe, M. (2017).  
1021 Modulation of Wnt signaling is essential for the differentiation of ciliated epithelial cells in  
1022 human airways. *FEBS Lett.* 591, 3493–3506.
- 1023 Sive, H.L., Grainger, R.M., and Harland, R.M. (2000). Early Development of *Xenopus*  
1024 *laevis* - A laboratory manual. *Cold Spring Harb. Protoc.* 5.

- 1025 Soares, E., and Zhou, H. (2018). Master regulatory role of p63 in epidermal  
1026 development and disease. *Cell. Mol. Life Sci.* *75*, 1179–1190.
- 1027 Stubbs, J.L., Davidson, L., Keller, R., and Kintner, C. (2006). Radial intercalation of  
1028 ciliated cells during *Xenopus* skin development. *Development* *133*, 2507–2515.
- 1029 Stubbs, J.L., Oishi, I., Izpisua Belmonte, J.C., and Kintner, C. (2008). The forkhead  
1030 protein *Foxj1* specifies node-like cilia in *Xenopus* and zebrafish embryos. *Nat. Genet.*  
1031 *40*, 1454–1460.
- 1032 Stubbs, J.L., Vladar, E.K., Axelrod, J.D., and Kintner, C. (2012). Multicilin promotes  
1033 centriole assembly and ciliogenesis during multiciliate cell differentiation. *Nat. Cell Biol.*  
1034 *14*, 140–147.
- 1035 Sun, D.I., Tasca, A., Haas, M., Baltazar, G., Harland, R.M., Finkbeiner, W.E., and  
1036 Walentek, P. (2019). Na<sup>+</sup>/H<sup>+</sup> exchangers are required for the development and  
1037 function of vertebrate mucociliary Epithelia. *Cells Tissues Organs* *205*, 279–292.
- 1038 Tan, F.E., Vladar, E.K., Ma, L., Fuentealba, L.C., Hoh, R., Hernan Espinoza, F.,  
1039 Axelrod, J.D., Alvarez-Buylla, A., Stearns, T., Kintner, C., et al. (2013). Myb promotes  
1040 centriole amplification and later steps of the multiciliogenesis program. *J. Cell Sci.* *126*,  
1041 e1–e1.
- 1042 Tilley, A.E., Walters, M.S., Shaykhiev, R., and Crystal, R.G. (2014). Cilia Dysfunction in  
1043 Lung Disease. *Annu. Rev. Physiol.* *77*, 379–406.
- 1044 Tran, H.T., Sekkali, B., Van Imschoot, G., Janssens, S., and Vleminckx, K. (2010).  
1045 Wnt/  $\beta$ -catenin signaling is involved in the induction and maintenance of primitive  
1046 hematopoiesis in the vertebrate embryo. *Proc. Natl. Acad. Sci.* *107*, 16160–16165.
- 1047 Vladar, E.K., and Brody, S.L. (2013). Analysis of ciliogenesis in primary culture mouse  
1048 tracheal epithelial cells (Elsevier Inc.).
- 1049 Walentek, P. (2018). Manipulating and Analyzing Cell Type Composition of the *Xenopus*  
1050 Mucociliary Epidermis. In Kris Vleminckx (Ed.), *Xenopus: Methods and Protocols*,  
1051 *Methods in Molecular Biology*, pp. 251–263.



- 1052 Walentek, P., and Quigley, I.K. (2017). What we can learn from a tadpole about  
1053 ciliopathies and airway diseases: Using systems biology in *Xenopus* to study cilia and  
1054 mucociliary epithelia. *Genesis* *55*, 1–13.
- 1055 Walentek, P., Beyer, T., Thumberger, T., Schweickert, A., and Blum, M. (2012). ATP4a  
1056 Is Required for Wnt-Dependent Foxj1 Expression and Leftward Flow in *Xenopus* Left-  
1057 Right Development. *Cell Rep.* *1*, 516–527.
- 1058 Walentek, P., Bogusch, S., Thumberger, T., Vick, P., Dubaissi, E., Beyer, T., Blum, M.,  
1059 and Schweickert, A. (2014). A novel serotonin-secreting cell type regulates ciliary  
1060 motility in the mucociliary epidermis of *Xenopus* tadpoles. *Development* *141*, 1526–  
1061 1533.
- 1062 Walentek, P., Beyer, T., Hagenlocher, C., Müller, C., Feistel, K., Schweickert, A.,  
1063 Harland, R.M., and Blum, M. (2015). ATP4a is required for development and function of  
1064 the *Xenopus* mucociliary epidermis - a potential model to study proton pump inhibitor-  
1065 associated pneumonia. *Dev. Biol.* *408*, 292–304.
- 1066 Walters, M.S., Gomi, K., Ashbridge, B., Moore, M.A.S., Arbelaez, V., Heldrich, J., Ding,  
1067 B. Sen, Rafii, S., Staudt, M.R., and Crystal, R.G. (2013). Generation of a human airway  
1068 epithelium derived basal cell line with multipotent differentiation capacity. *Respir. Res.*  
1069 *14*, 26–30.
- 1070 Warburton, D., El-Hashash, A., Carraro, G., Tiozzo, C., Sala, F., Rogers, O., Langhe, S.  
1071 De, Kemp, P.J., Riccardi, D., Torday, J., et al. (2010). Lung Organogenesis. In *Current*  
1072 *Topics in Developmental Biology*, pp. 73–158.
- 1073 Warner, S.M.B., Hackett, T.L., Shaheen, F., Hallstrand, T.S., Kicic, A., Stick, S.M., and  
1074 Knight, D.A. (2013). Transcription factor p63 regulates key genes and wound repair in  
1075 human airway epithelial Basal cells. *Am. J. Respir. Cell Mol. Biol.* *49*, 978–988.
- 1076 Zuo, W., Zhang, T., Wu, D.Z.A., Guan, S.P., Liew, A.A., Yamamoto, Y., Wang, X., Lim,  
1077 S.J., Vincent, M., Lessard, M., et al. (2015). P63+ Krt5+ distal airway stem cells are  
1078 essential for lung regeneration. *Nature* *517*, 616–620.

1079

# Xenopus epidermis

*mucociliary clearance*

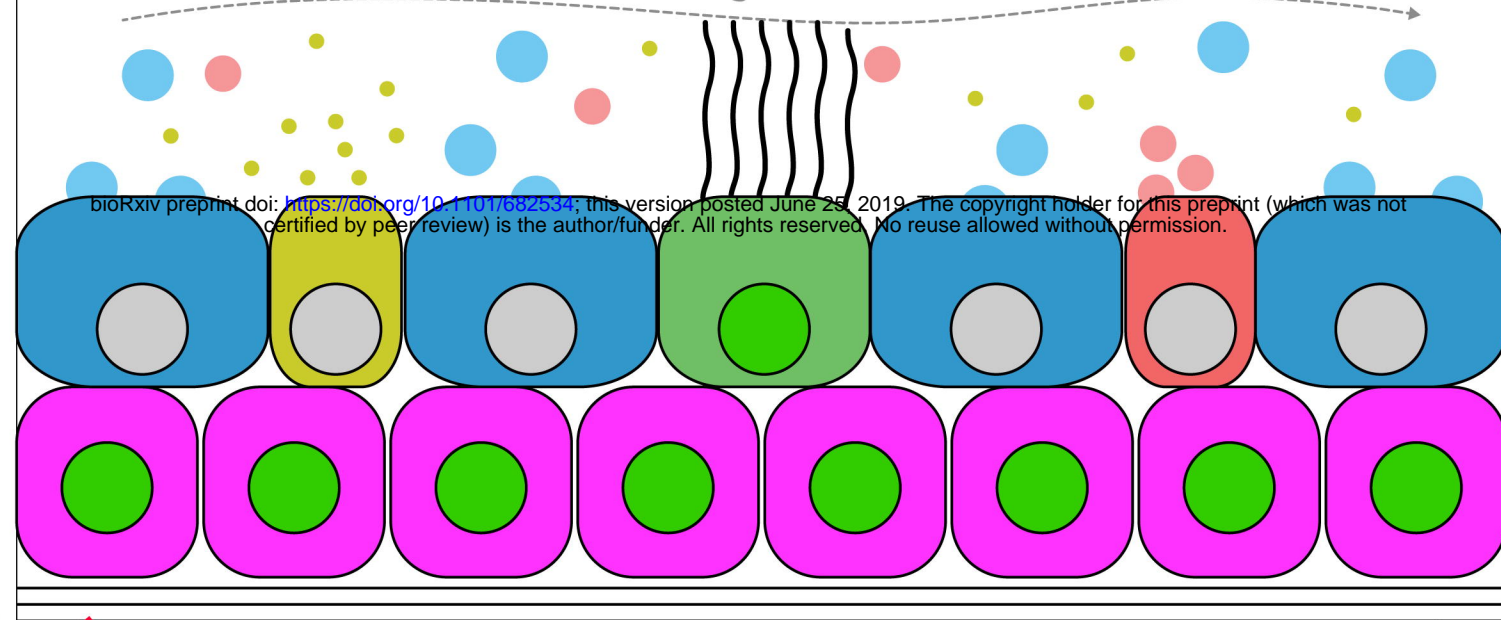

# Basal cell hyperplasia

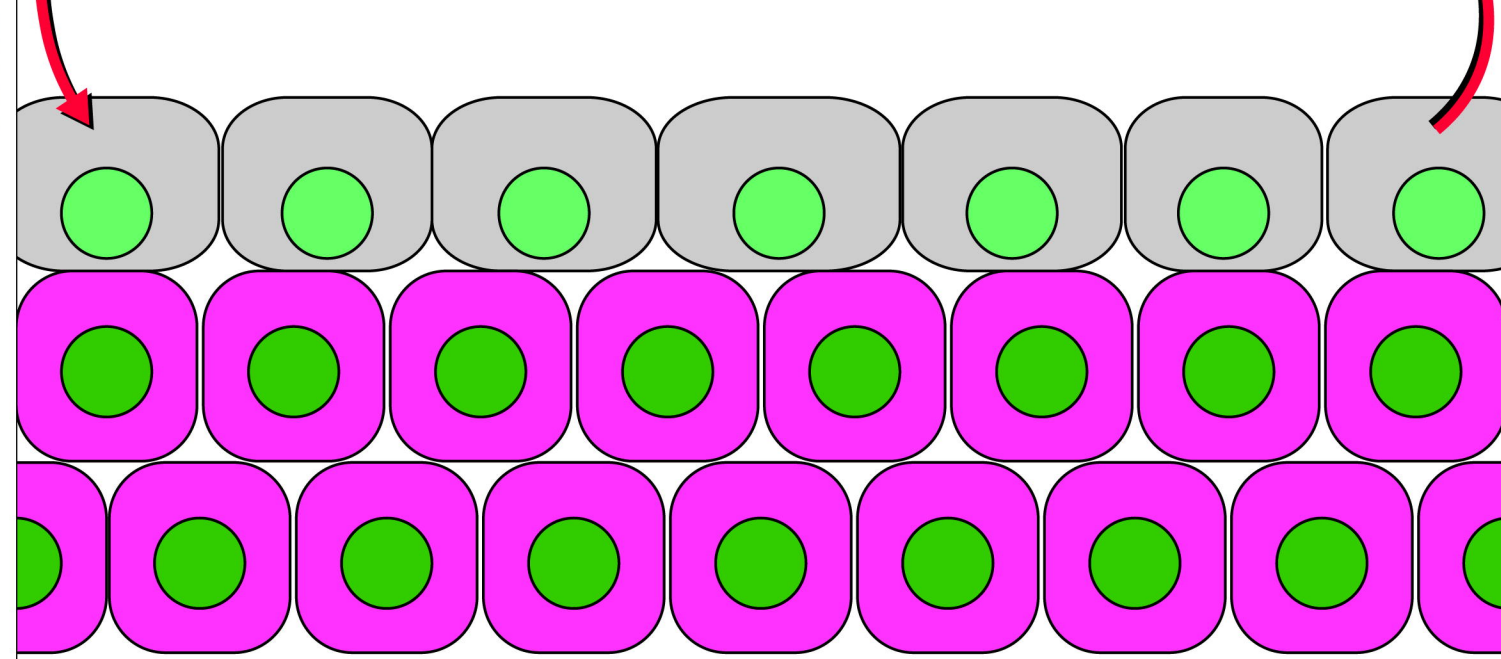

# mammalian airway

*mucociliary clearance*

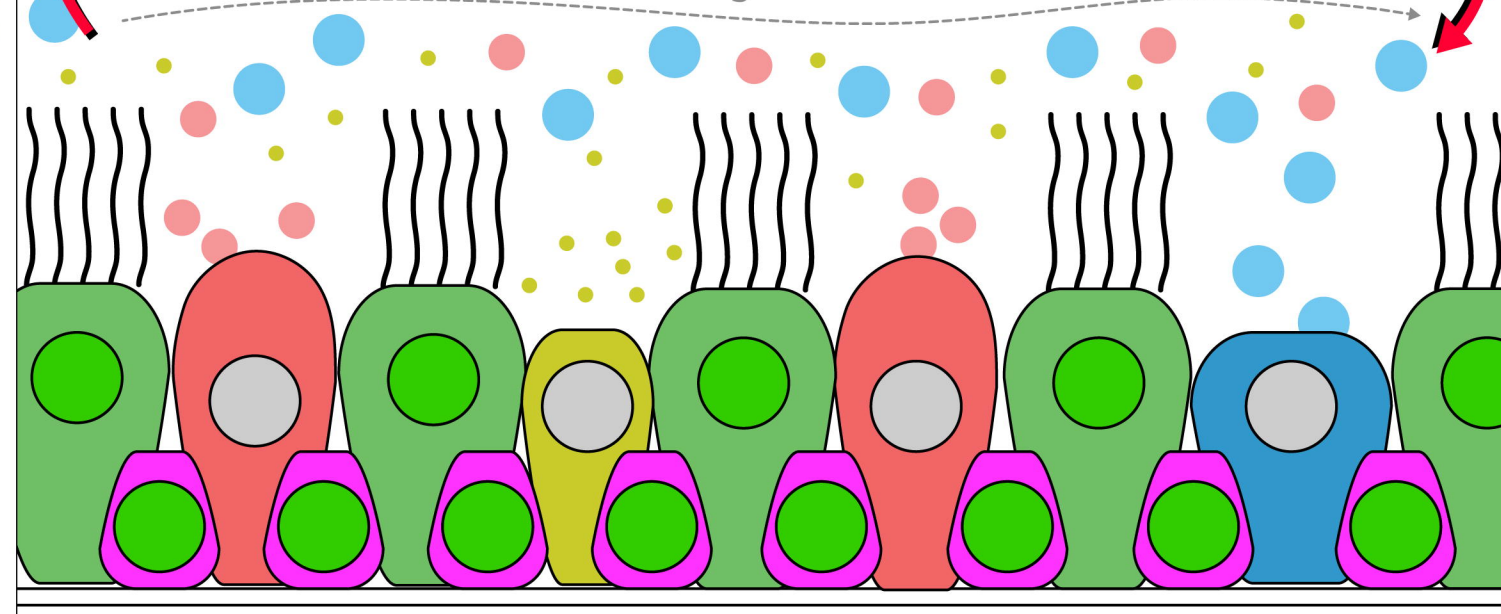

# conserved Wnt-regulated events

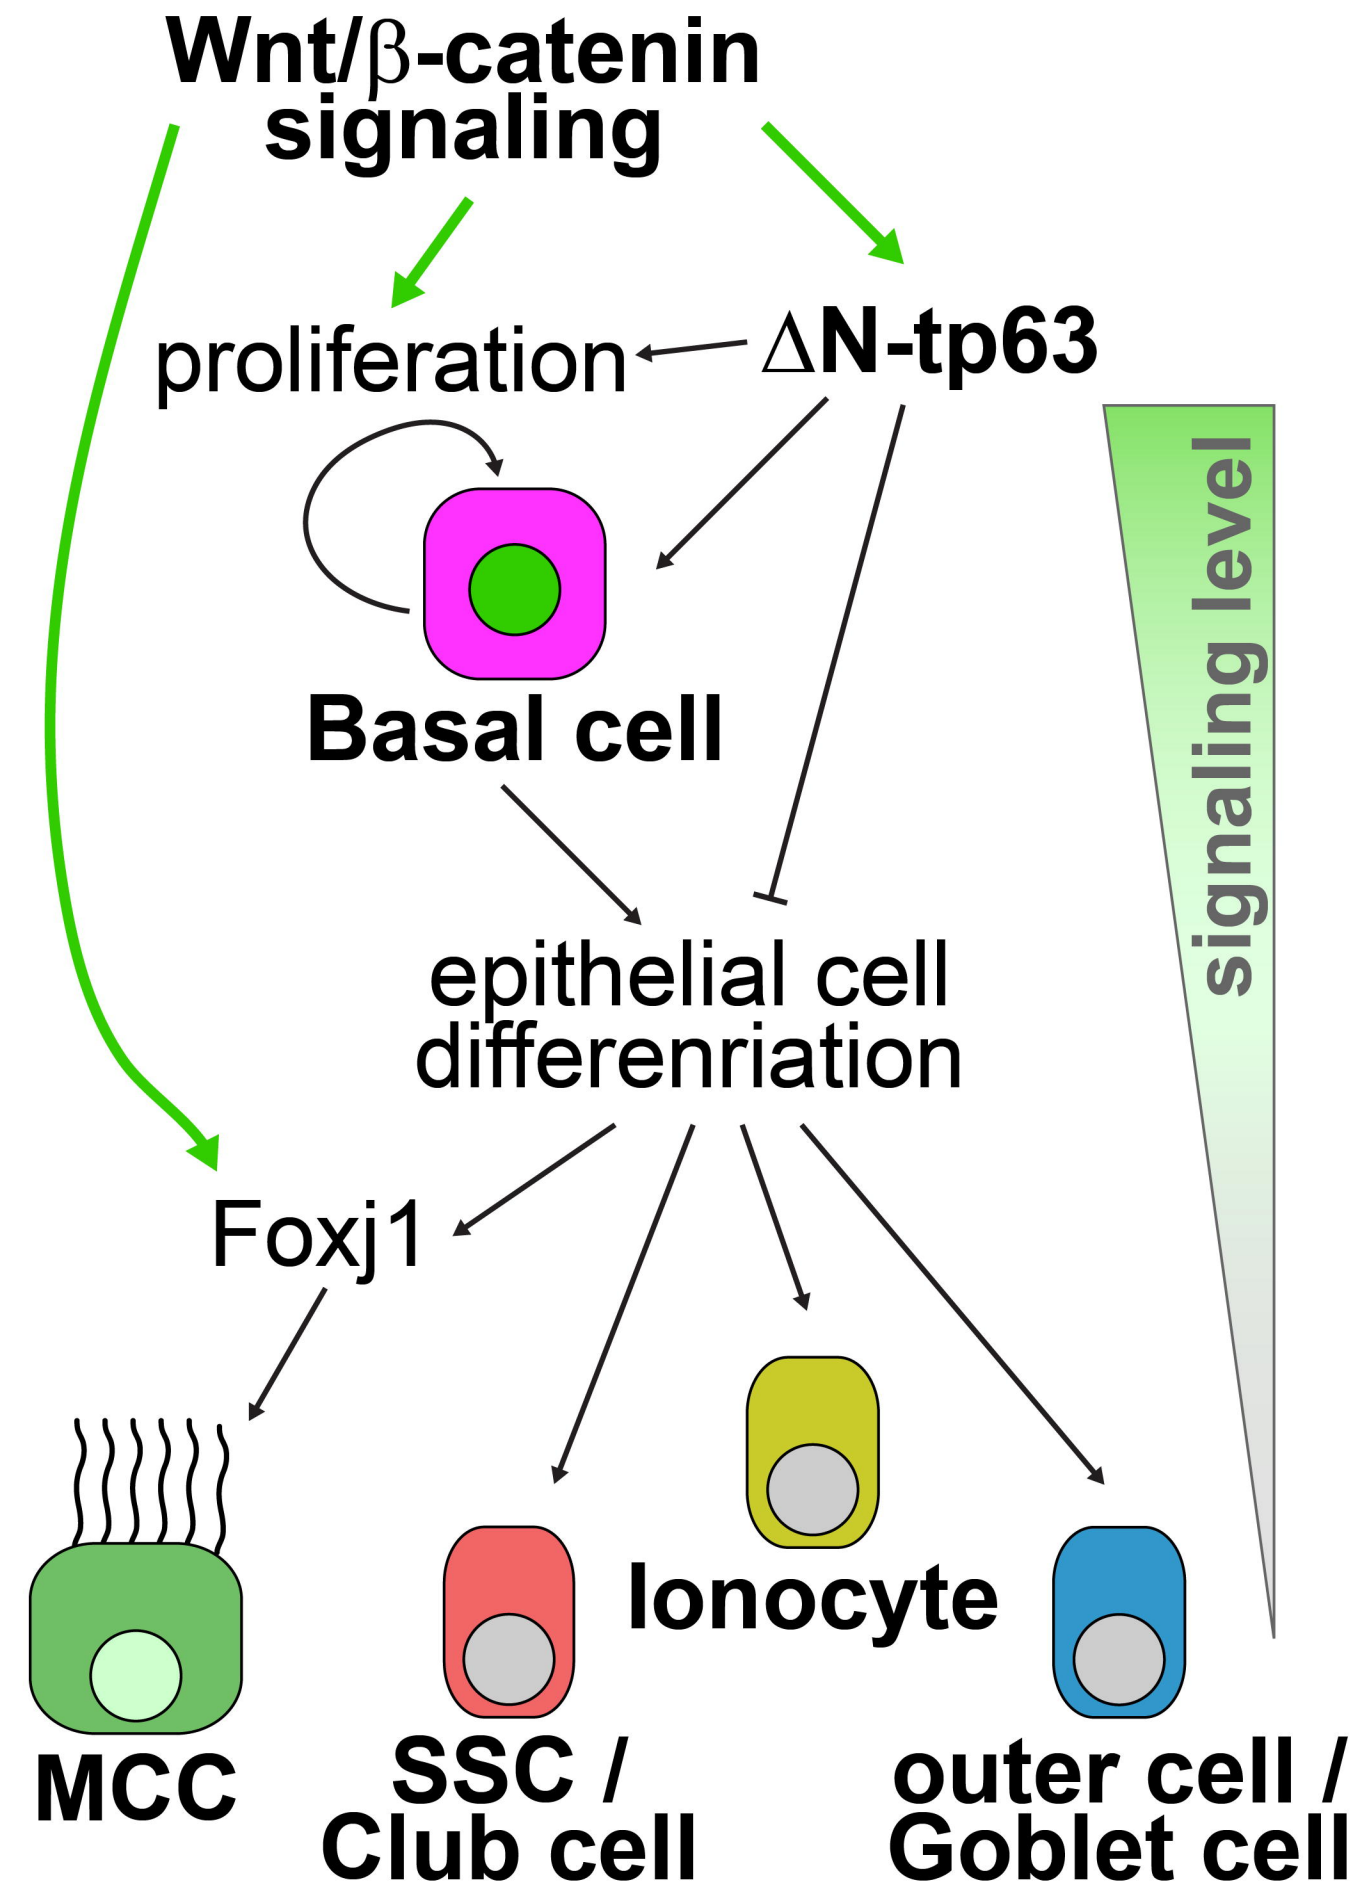



**Figure 1**

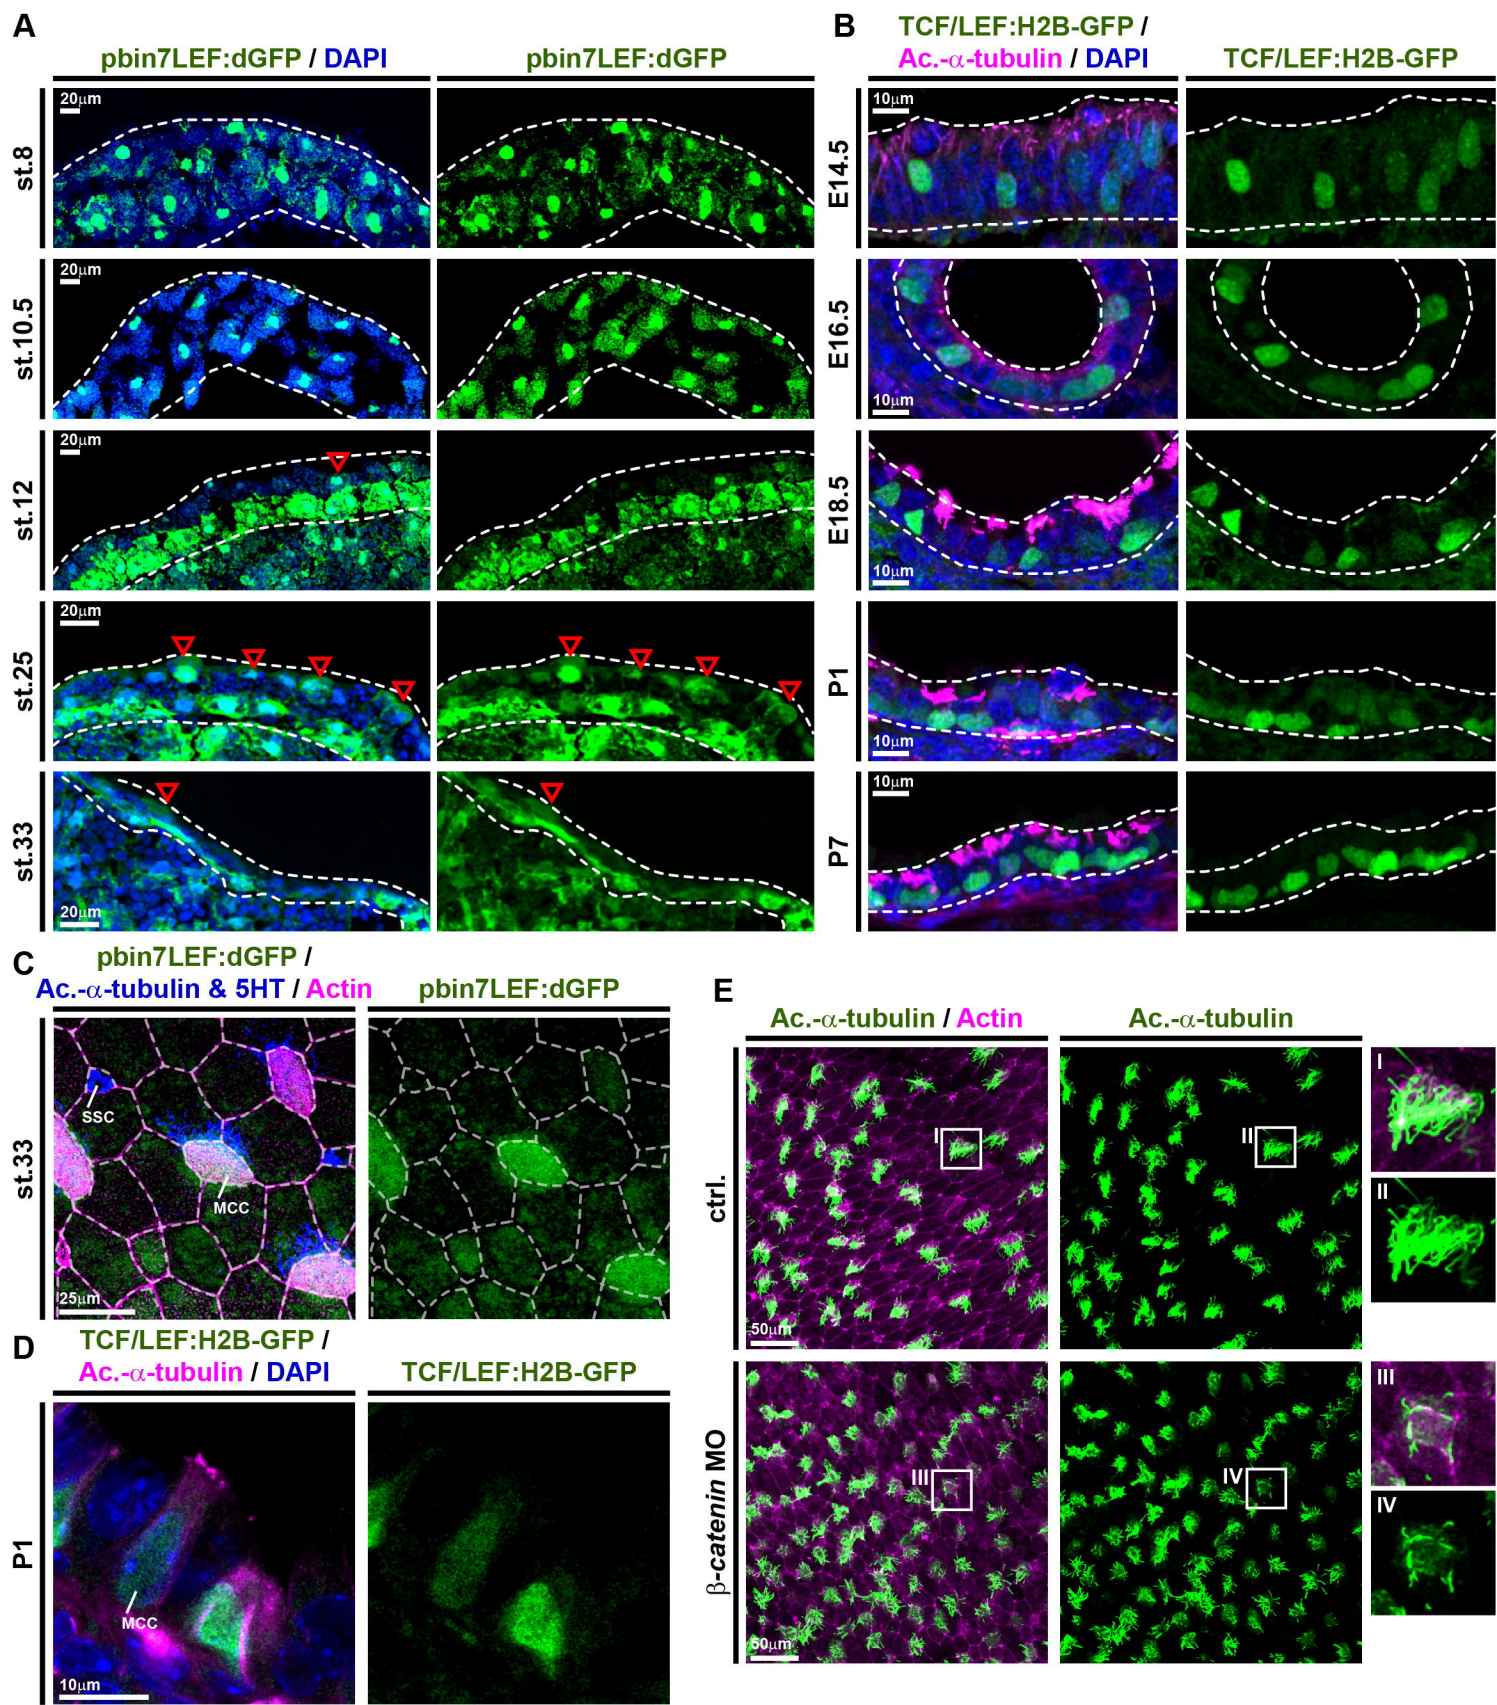



**Figure 2**

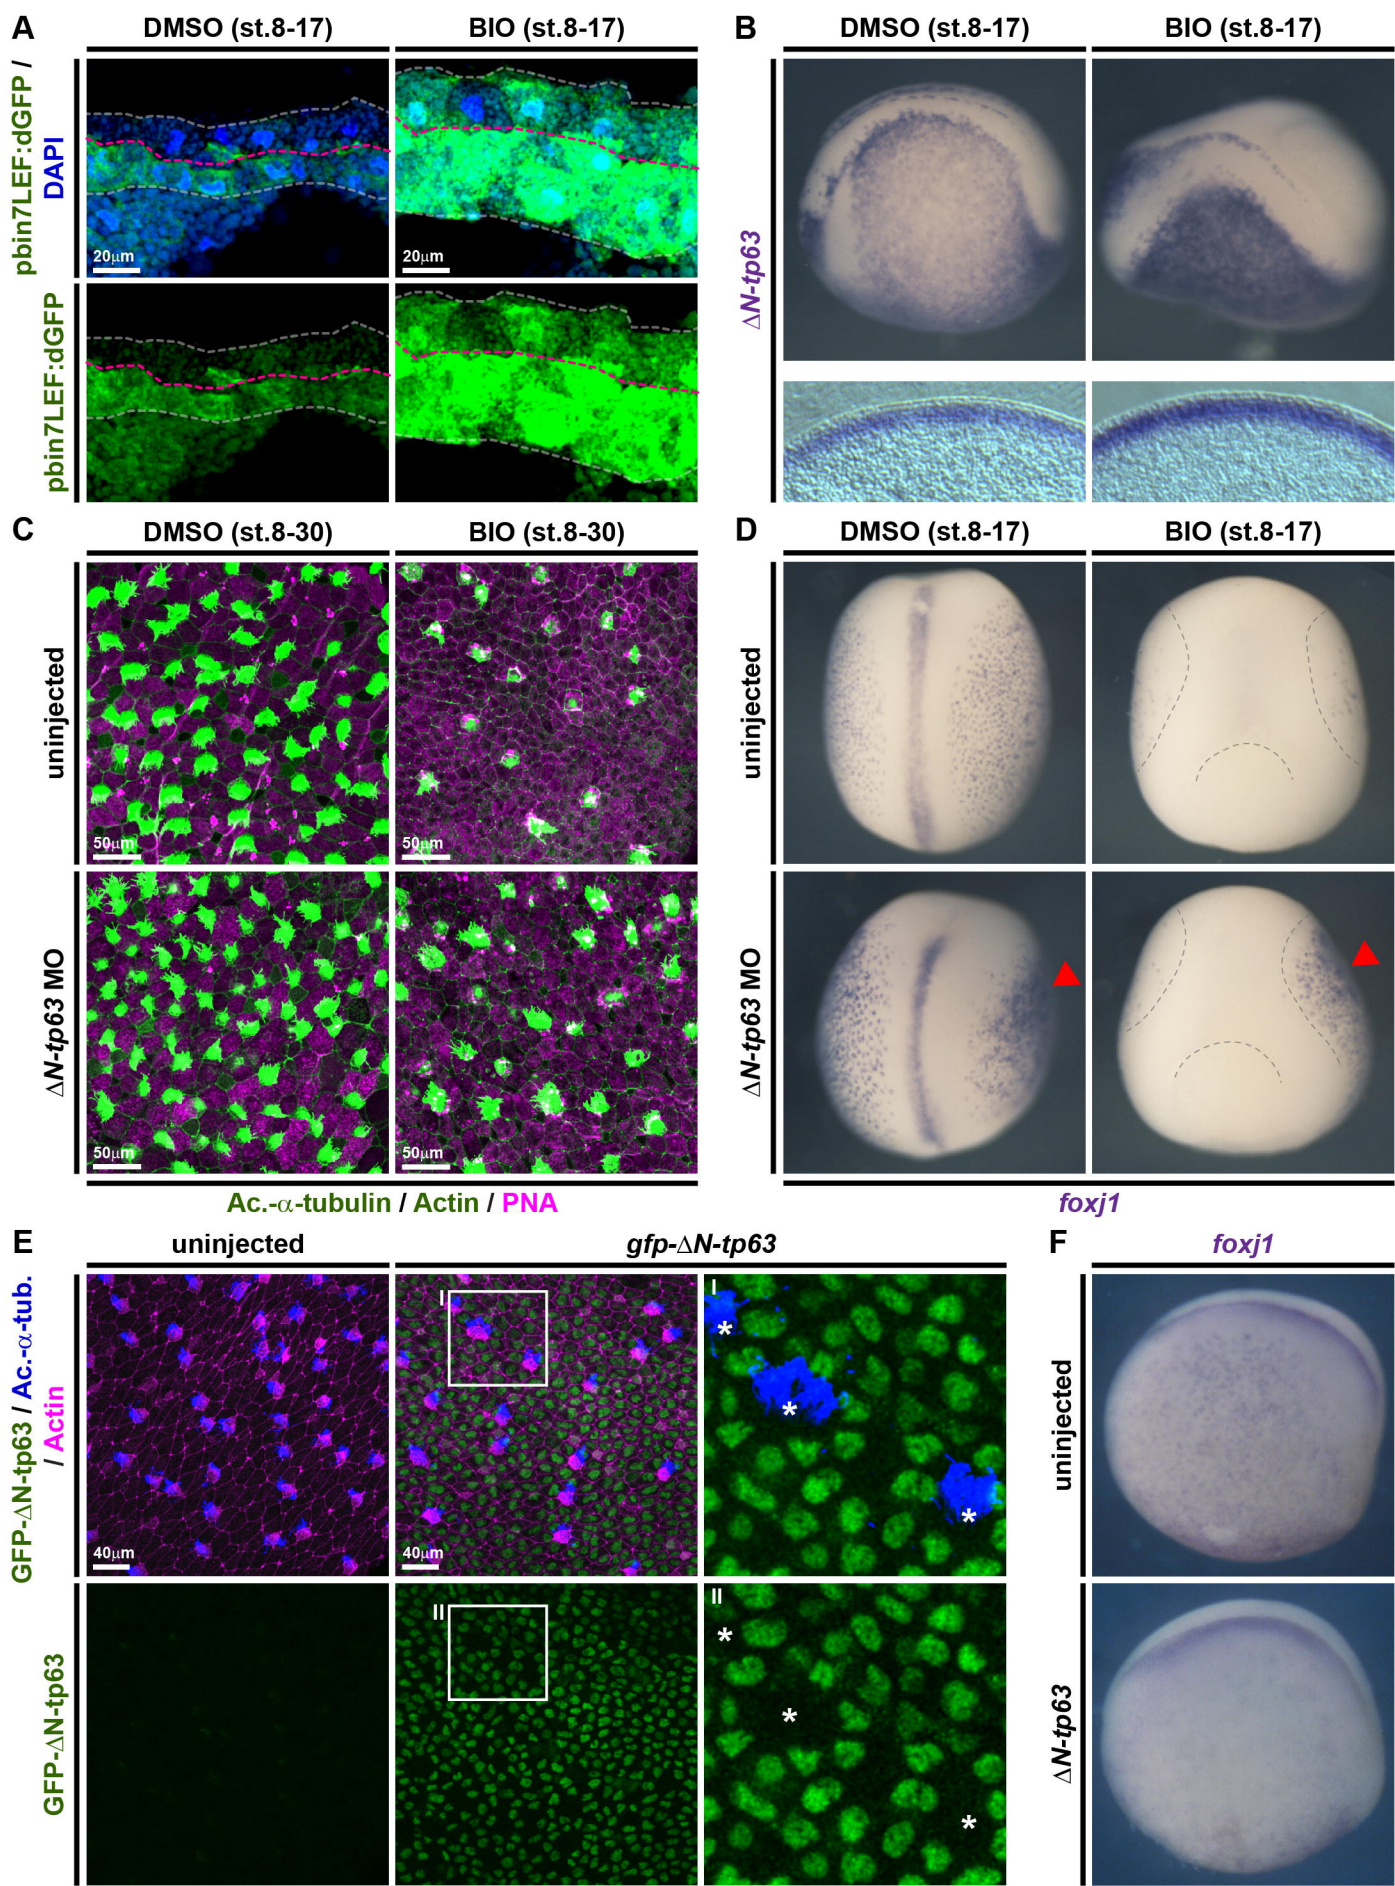



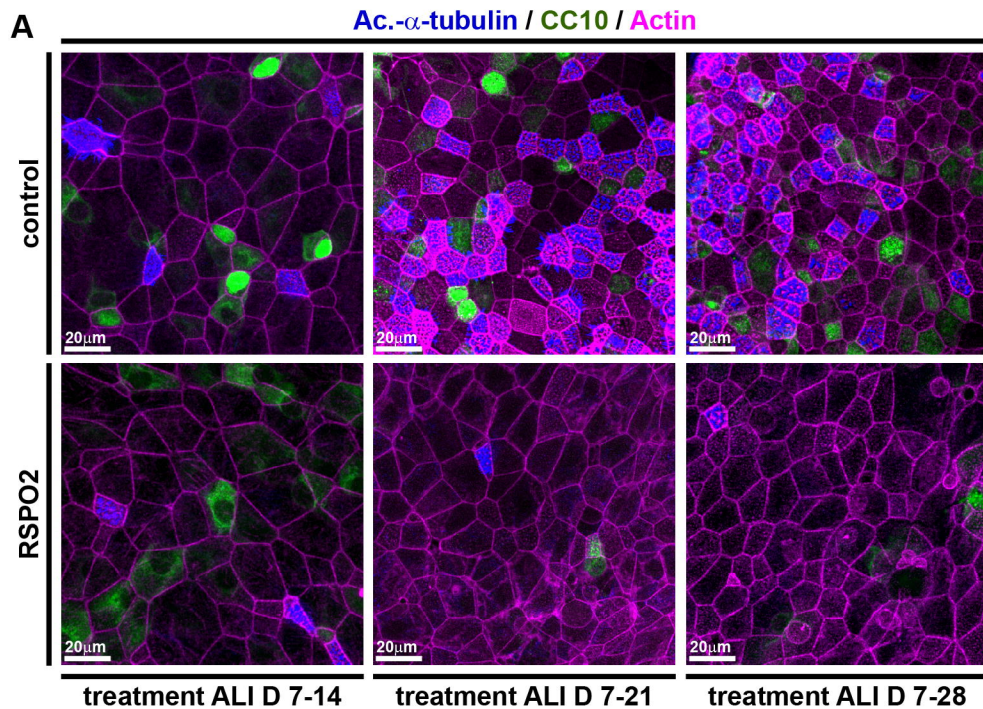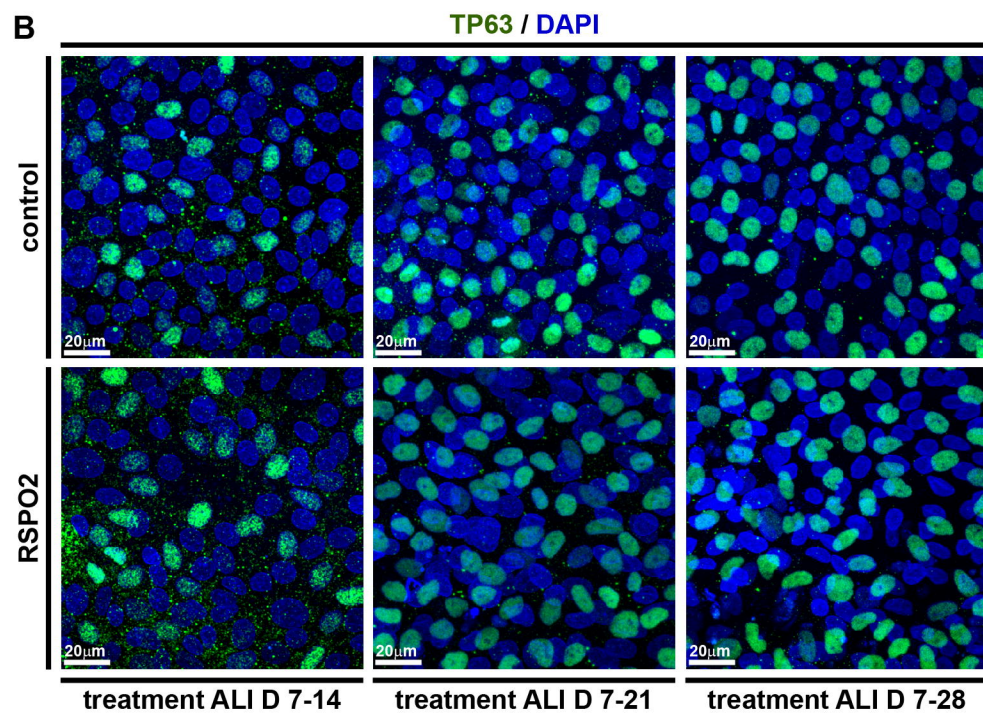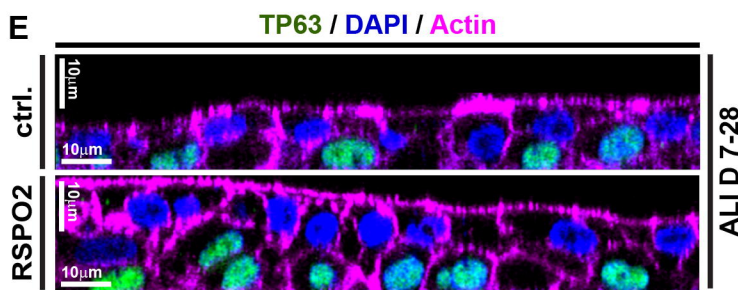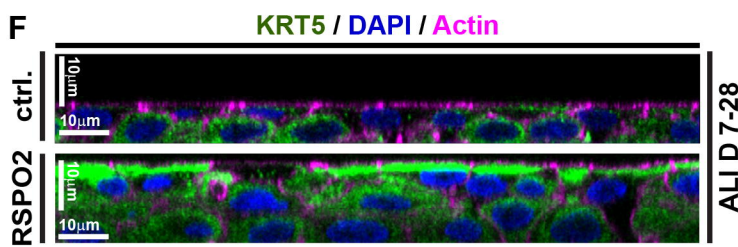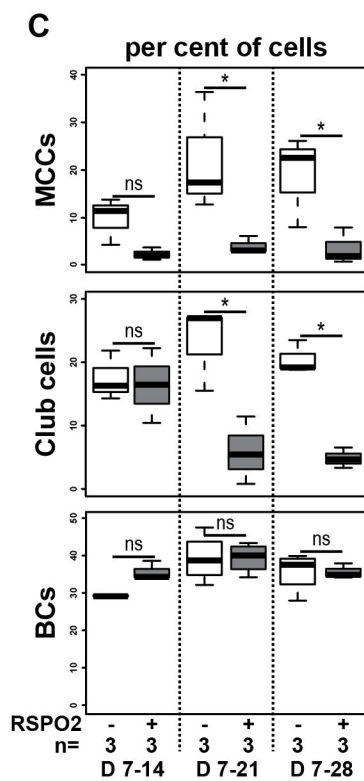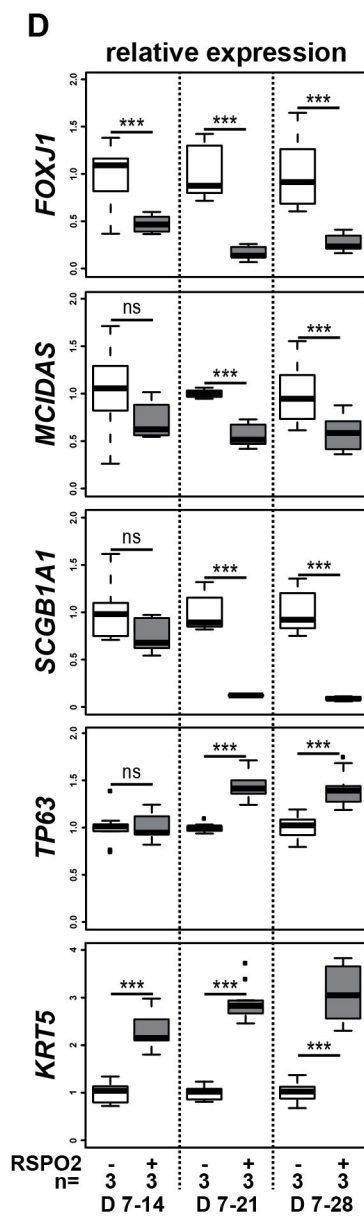



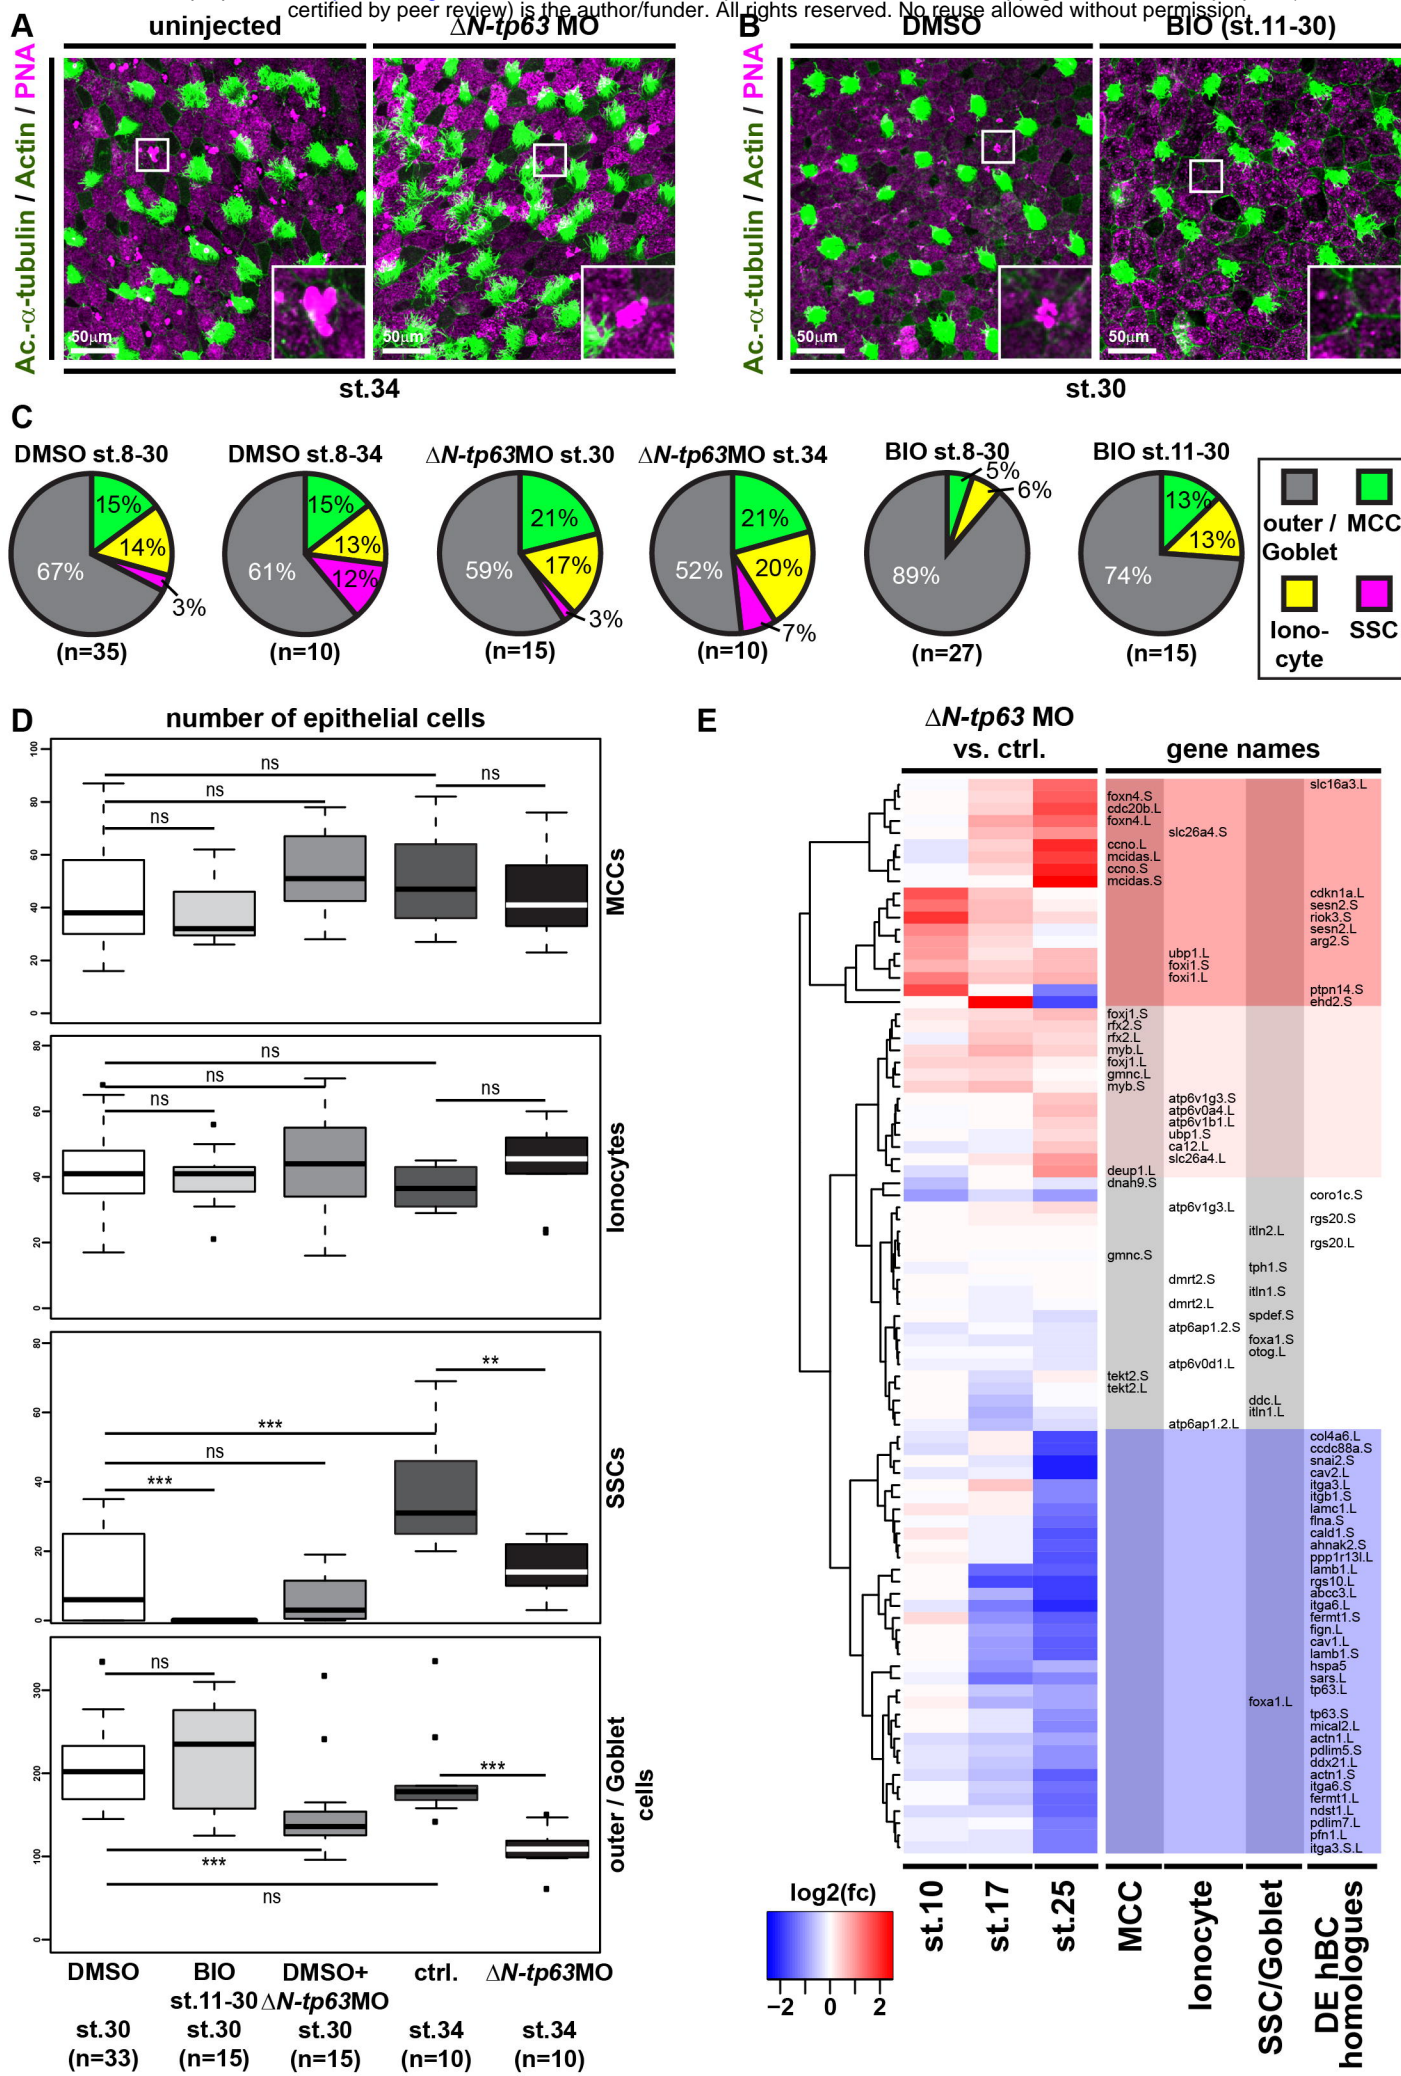



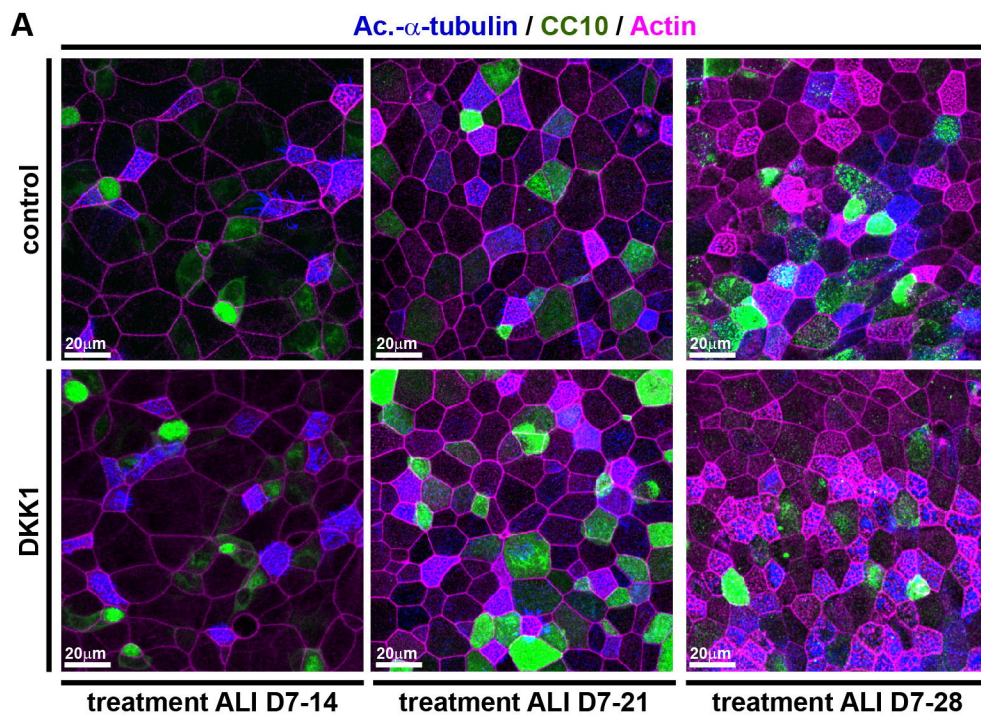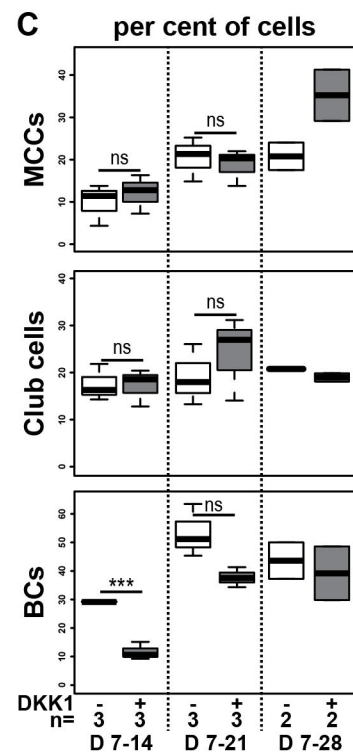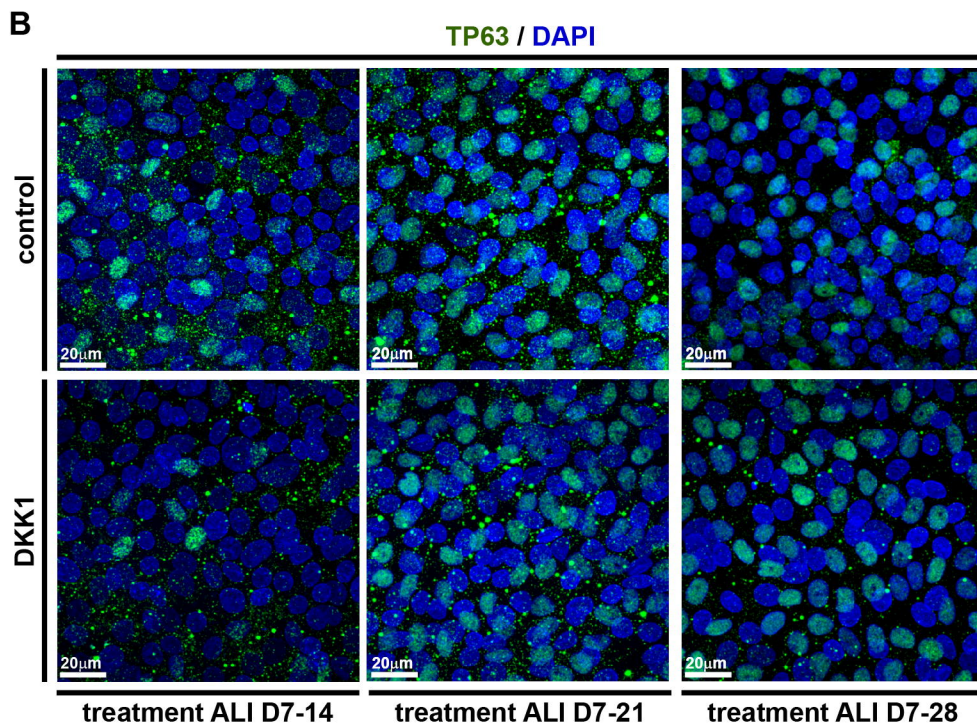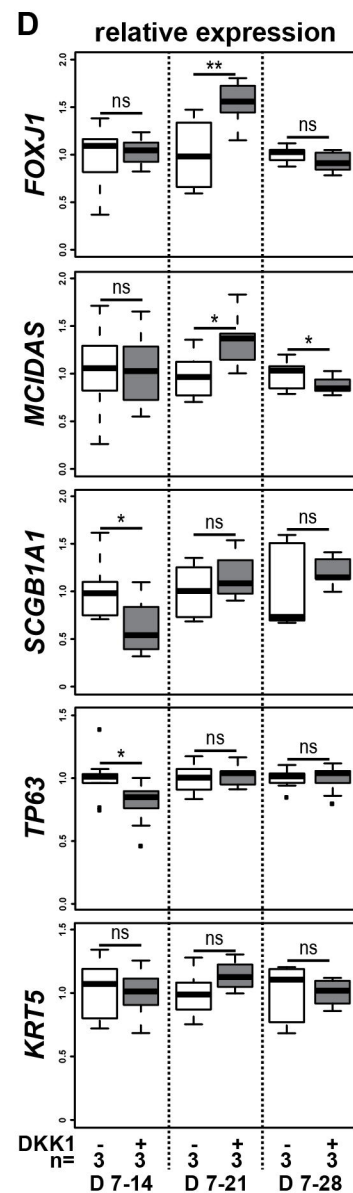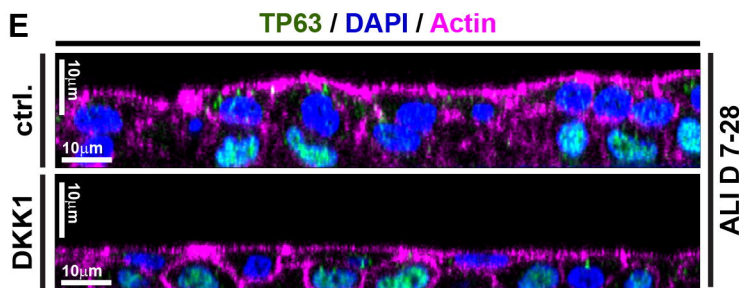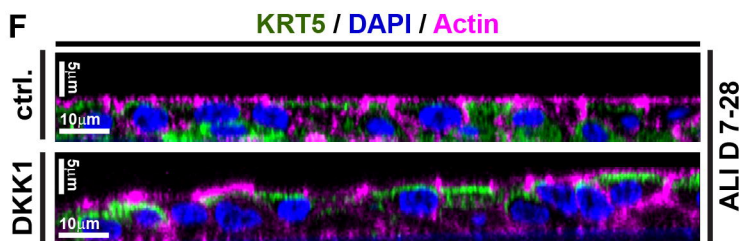



**Figure 6**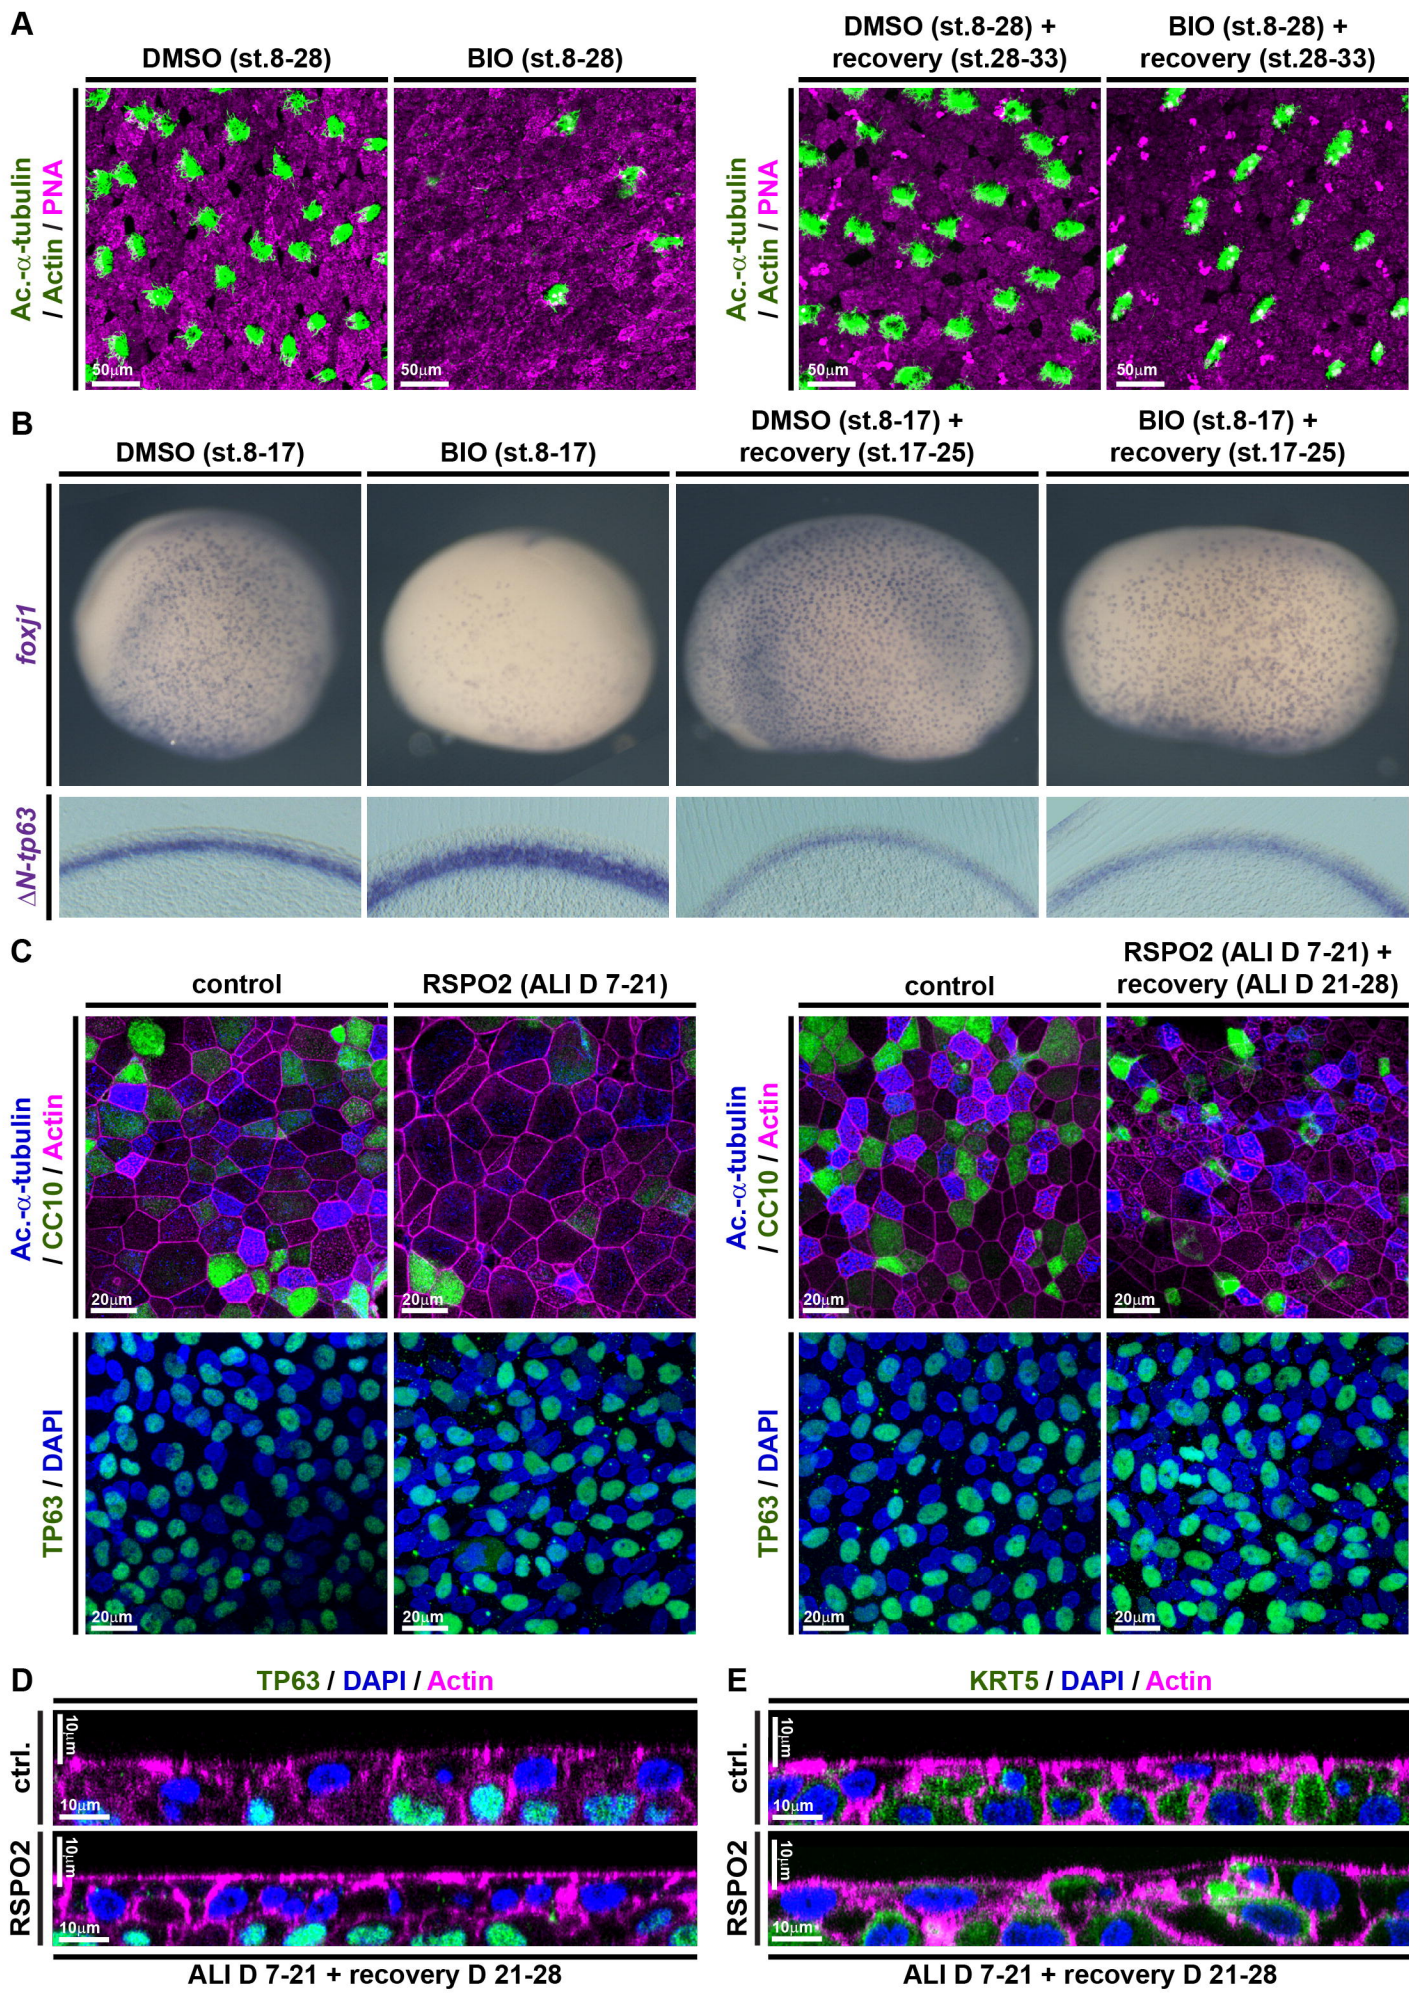

Source: https://www.biorxiv.org/content/10.1101/682534v1.full.pdf
